# Supplementary material
Source: PubMed Central journal article supplement (PMC4741319)
Supplement: supp_pp.15.00070_PP2015-00070R1_Supplemental_Material.pdf [file supp_pp.15.00070_PP2015-00070R1_Supplemental_Material.pdf]

1 **Figure S1** | Sequence alignment of *NbAGO1-IL* and *NbAGO1-IH*. Stars indicate identical  
2 consensus nucleotides. Splicing donor and acceptors marks of introns are in red, whereas in blue are  
3 introns. Putative 5'- and 3'-untranslated regions are in black underlined in promoter and in the  
4 terminator regions.

5

6 **Figure S2** | PCR-based strategy for validating *NbAGO1-IL* and *NbAGO1-IH* loci retrieved from  
7 genomic data. (A) Alignments of *NbAGO1-IL* and *NbAGO1-IH* introns11 and surroundings (*i.e.*  
8 exons 11 and 12 and part of intron 10) are reported. Sequences of oligonucleotides used are in green  
9 or violet and pairs of oligos used are reported in same color (*i.e.* oligo ex11 forward/oligo int11  
10 reverse and oligo int11 forward/oligo ex12 reverse). (B) Alignment of *NbAGO1-IL* and *NbAGO1-*  
11 *IH* terminator regions including the stop codon (in red) and part of the exon22. Sequences of  
12 oligonucleotides used are in green (*i.e.* oligo ex22 forward and oligo terminator (ter) reverse). (C)  
13 Table reporting the expected fragment size originated from each of the oligonucleotide combination  
14 in A and B. Stars indicate consensus sequences. Splicing donor and acceptors marks of introns are  
15 in red, whereas in blue are introns. Arrows in black above the alignments indicate directions of  
16 introns/exons/terminator regions. Arrows below the alignments indicate the directions of  
17 oligonucleotides used and are colored the same as the corresponding sequences.

18

19 **Figure S3** | List of *NbAGO1-I* transcript species found in the RNA-Seq dataset of Nakasugi *et al.*,  
20 2013 [21] available at [www.benthgenome.com](http://www.benthgenome.com).

21

22 **Figure S4** | Multiple alignment of miR168 family members of *N. tabacum* (i) and of all known  
23 miR168 isoforms (ii). Sequences of different plant species were retrieved from miRbase  
24 (<http://www.mirbase.org>) and submitted to ClustalW. Sequences in red are not conserved and show  
25 an occurrence <50%.

26

27 **Figure S5** | qRT – PCR for discriminating *NbAGO1-IH* and *L.* A) Agarose gel analysis of end-  
28 point PCR for *NbAGO1-IH* and *NbAGO1-IL* using as template the two *NbAGO1-I* homeolog  
29 transcripts cDNAs in two different plasmid at different concentration (5 ng, 500 pg, and 50 pg). B)  
30 Amplification plot and C) melt curve analysis of *NbAGO1-IL* amplification in real-time PCR. The  
31 reaction detected 100 pg of plasmid containing the *NbAGO1-IL* transcript and a cDNA template of  
32 *Nicotiana benthamiana*, the non-target plasmid containing *NbAGO1-IH* sequence was not  
33 amplified. D) Amplification plot and E) melt curve analysis of *NbAGO1-IH* amplification in real-  
34 time PCR. The reaction detected 100 pg of plasmid containing the *NbAGO1-IH* transcript and a

35 cDNA sample of *Nicotiana benthamiana*, the non-target plasmid containing *NbAGO1-IL* sequence  
36 was not amplified.

37

38 **Figure S6** | Multiple alignment of annotated Argonaute1 mRNAs of *Solanum lycopersicum* (Sly),  
39 *Solanum tuberosum* (Stu) and *NbAGO1-IH* mRNA in the region containing the miR168 target site  
40 (in red in the frame). *SlyAGO1A*-like-Acc.no.JX945381.1, NM\_001279128; *SlyAGO1B*-Acc.no.  
41 JX945382.1, NM\_001279332, JX467705.1; *StuAGO1B*-Acc.no. XM\_006364332; *StuAGO1*-like  
42 Acc.no.XM\_00634730

Figure S1

PROMOTER region AND TRANSCRIPTION START SITE

|           |                                                                    |      |
|-----------|--------------------------------------------------------------------|------|
| NbAGO1-1H | CAAGTAATGTTTTAAATTTTATTTTGAGAAAAGTAGCTAAAATCTATGGCCAAACGGTAG       | 60   |
| NbAGO1-1L | AAAACAATATTTTCAATTTATTTTGAAAAAATTAGCTAAATCTACGGCCAAACGGGAG         | 60   |
|           | ** ** ** *                                                         |      |
| NbAGO1-1H | CTAAGAATATC-CTATATCTCATACTACATTTTATTTTACCAATGTGAGACTGTATTTA        | 119  |
| NbAGO1-1L | CTAAGTGTATCTCTATATCTCATACTACATTTTGAATAACCAATGTGAGACTGTATTTA        | 120  |
|           | ***** **                                                           |      |
| NbAGO1-1H | CACAATTA--TATAACATTCATACTATTCGATTTTATATATTTATTCCTAGAAATCTT         | 177  |
| NbAGO1-1L | CATAATGAACATATAACATTCATACTATTCATTTTGTAAATTTATTTCTAGAAATCTT         | 180  |
|           | ** ** ** *                                                         |      |
| NbAGO1-1H | TTGTAATATCTTATATTTATTTCTAAATTTTGTGAATGTAGATCTTGGCATCTAAT           | 237  |
| NbAGO1-1L | TGTAATATCTTATATTTATTTCTAAATTTTGTGAATGTAGATCTTGGCATCTAAT            | 240  |
|           | ** ** ** *                                                         |      |
| NbAGO1-1H | TTTGTGAGTAACCTTAACATAAATCCACAGCTTGTGGACCTCGTTAAGGGATCTCA           | 297  |
| NbAGO1-1L | TTTGTGAGTAACCTTGAGAAAACCTCCACAGCTTGTGGACCTCATTAAGGGATCTCA          | 300  |
|           | ***** **                                                           |      |
| NbAGO1-1H | TCA-TTGATGAGGG--TATATTTTCGTTTGTTCATTATTCTGTCCAGCTATCAAGTCAA        | 354  |
| NbAGO1-1L | TTAATTTGATGAGGGAGTATATTTTCGTTTGTTCATTATTCTGTCCAGCTATCAAGTCAA       | 360  |
|           | ** ** ** *                                                         |      |
| NbAGO1-1H | AATATTAATAAAGTATTGG--GCCAACACACATATAGAAATATAAAATAAAAACACA          | 411  |
| NbAGO1-1L | AACATTAATAAAGCTGCTATAGCCAAACATATATAGAAA-----                       | 403  |
|           | ** ***** * *                                                       |      |
| NbAGO1-1H | CATTTTCGTAAATGAGAAAACCAAACAATGATTTGGACAAAAGGAAAACCTGAAA            | 471  |
| NbAGO1-1L | -----ACTTGAAA                                                      | 411  |
|           | *****                                                              |      |
| NbAGO1-1H | TACACATCCCATGTGACCCAGAAAATCCAAAAGATGGATAAAAATAAAACCGAGTAA          | 531  |
| NbAGO1-1L | TGCACATGCTATGCGACCAAGAAAACCCAAAAGATGGATAAAAATGAAA-----             | 463  |
|           | * ** ** *                                                          |      |
| NbAGO1-1H | ACTTATTAACATTTAATTTAATTTGATATTATTGATTTACCAAACTCAATATAAACAG         | 591  |
| NbAGO1-1L | -----ACCAAGCTCAATATAAAA                                            | 484  |
|           | *****                                                              |      |
| NbAGO1-1H | TTGGATTATGTTT-CCTATTAGTGACCTTTGCAACAGTAGAGCAGCGAAATGAAGTAGAG       | 650  |
| NbAGO1-1L | TTGGATTCAGTTTTCCTATTGGTGACCTTACCAACAGTAGAGCAGCGAAATGAATAGAG        | 544  |
|           | ***** **                                                           |      |
| NbAGO1-1H | TAGGGACAGATTCGTCAATTTAGAACAACAACCCGTGGTTTAAAGGAGCGAGTCTGC          | 710  |
| NbAGO1-1L | TAGGGACAGATTCGTCAAT--AGAACAACCCAGCC-----TGA                        | 581  |
|           | ***** **                                                           |      |
| NbAGO1-1H | TTAACGTGTCTCTCTTTCGCTTTTGTATCTACACATTTATTTCTCTCTACAAAT             | 770  |
| NbAGO1-1L | TTAATGCAATCTCTCTCTTTCGCTTTTGTATCTACACATTTATTTCTCTCTACAAAT          | 641  |
|           | *** **                                                             |      |
| NbAGO1-1H | <u>CACACTCACCTATCACTCTCTTTCTCTCTCTAGAAGCATATAGTCCGTTCTCTCTCTC</u>  | 830  |
| NbAGO1-1L | <u>CACGCTCACCTATCACTCTCTTTCTCTCTCTAGAAAGCATATAGTCCGTTCTCTCTCTC</u> | 700  |
|           | *** *****                                                          |      |
| NbAGO1-1H | CGCCTCTCTCTCTGTTTTAGGGCACCGTGGTGGTATCCTGGCGCGTTTTGAGGT             | 890  |
| NbAGO1-1L | -GCCCTCTCTCTGTTTTAGGGCACCGTGGTGGTATCCTGGCGCGTTTTGAGGT              | 759  |
|           | *****                                                              |      |
| NbAGO1-1H | ATATGATTTTACTCGCTATGTTTACTTTAGCTTTT-ACATTTTCTGTAGACTAGCT           | 949  |
| NbAGO1-1L | ATATGATTTTACTGTTATGTTAGTTAGCTTTTACGTTTTTTGTTAGACTAGCT              | 819  |
|           | ***** **                                                           |      |
| NbAGO1-1H | GGGTTTTTT-ATTGTGTTTTTTT-CGATCTAGGGTTTTGCCTTGCACTGATAGTTT           | 1006 |
| NbAGO1-1L | GGTTTTTTTTACTGTGTTTTTTTTTCGATCTAGGGTTTTGCCTTGCACTGATAGTTT          | 879  |
|           | ** ** ** *                                                         |      |
| NbAGO1-1H | GATTTT-CTTGTCTTCTTGAGTTCAGTTAATTATCAGATCTAAATGACAGTATGAGTTT        | 1065 |
| NbAGO1-1L | GATTTTCTCTGTTTTTCGTTGAGCTCASTTAATTATCAGATCTAAATGACAGTATGAGTTT      | 939  |
|           | *****                                                              |      |
| NbAGO1-1H | CTTTGTTGCTTGTGTTATTAGTTTTTTCT---CATGTGTATGTCCTCGAAATGTAGA          | 1122 |
| NbAGO1-1L | CTTTGTTGCTTATGTTATGAGTTTTTCTCATATATGTTGATGTGC---GAAATAACGG         | 996  |
|           | ***** **                                                           |      |
| NbAGO1-1H | TTTTAGAAGTTTGTGTTTCGTTTATTTGAACTCTCTCTTTTGTGGGTTTTTC               | 1182 |
| NbAGO1-1L | TTTTAGAAGTTTGTGTTTCGAGTTTATTTAACTCTCTCTTTTGTGTTTTTCC               | 1056 |
|           | ***** **                                                           |      |
| NbAGO1-1H | CTCCAAAATGTGAAGTTATGAGTTCAGTGTGATCTGTTTATCACTGTATGTTCTTTT          | 1242 |
| NbAGO1-1L | TTCCGAAAATGTGAAGTTATGAGTTCAGTGTGAGCTGTTTATCACTGTATGTTCTTTT         | 1116 |
|           | ** *****                                                           |      |
| NbAGO1-1H | -GATATGTTA---GTTTTATAGACTGCTGTAAGGAAGTAAATTTGATTTCCGTTCTGT         | 1297 |
| NbAGO1-1L | TGATATGTTACTTAGTTTTATAGACTGCTGTAAGGAAGTAAATTTTATTTCCGTTCTGT        | 1176 |
|           | ***** **                                                           |      |
| NbAGO1-1H | GTATCATCCTGTTAGCTCTATTTTA-----                                     | 1322 |
| NbAGO1-1L | TTATCATCCTGTTAGCTCTATTTTATTGATAGTACTCACTTACTGTCTCTTGTGATGTC        | 1236 |
|           | *****                                                              |      |
| NbAGO1-1H | -----                                                              | 1296 |
| NbAGO1-1L | TTGACCGAGGTCCTCTAGAAACAGTCTCTCTGCTTACATATCACCTCTCCAGACC            | 1296 |
|           | -----                                                              |      |
| NbAGO1-1H | -----ATTGTT----TGATGACTAGTCTTAAGTGATGTC-TAA                        | 1356 |
| NbAGO1-1L | CACTGTGGGATTTACTGGATTGTGTTGTTGATGACTAGTATTAAATGATTTCTTAA           | 1356 |
|           | *****                                                              |      |
| NbAGO1-1H | ACTATATGATTTTTTAAATCATTATCCGGTTCCCTTTGTTATCTGCAATGACACTC           | 1416 |
| NbAGO1-1L | ACTATATGATTTTTTCAAATCATTATGGGTTCCCTTTGTTATCTGCAATGACACTC           | 1416 |
|           | *****                                                              |      |
| NbAGO1-1H | TTAAGGTGTGTTGCTGTAGTCTGTGGAGGCTAAGGCTGTGAGTATGTCCTTTATATCTT        | 1476 |
| NbAGO1-1L | TTAAGGTGTGTTGCTATAGTCTGTGGAGGCTAAGGCTGTGAGTATGTCCTTTATATCTT        | 1476 |
|           | *****                                                              |      |
| NbAGO1-1H | CTATAATGGCTTTAAG-ATAAATGATTAATGGGTAACCTAACTGCCATTGCTATATT          | 1535 |
| NbAGO1-1L | CTATACTTTGTTTAAAGCATAAATGATTAATGGGTAACCTAACTGCCATTGCTATATT         | 1536 |
|           | ***** **                                                           |      |

4  
4  
4  
4  
4  
4  
4  
4  
4  
4  
4  
4  
4  
4  
4  
4  
5

NbAGO1-1H TTGATTAGTAGGGTTCGTCTTGTGTTAAATTATAAACCTATATTTTAAACAACATTGT 1595  
 NbAGO1-1L TTGATTAGTAGGGTTCGTCTTGTGTTAAATTATAAACCTATATTTTAAACAACATTGT 1596  
 \*\*\*\*\*

NbAGO1-1H CTGTGTTATCTTTGTTTATCAAGATTATTGTTTGTCTATTTGTTTATCAATTCAGAG 1655  
 NbAGO1-1L CTGTGTTATCTTTGTTTATCAAGTTTATTGTTTGTCTATTTGTTTATCAATTCAGAG 1655  
 \*\*\*\*\*

NbAGO1-1H CAATCTGGATGGGAAGAATACCTTTGGGTTTGGTAGTGAAGAAATGTTTCTGCAATA 1715  
 NbAGO1-1L AAACCCGGATGGGAAGAATGCCCCTTTGGGTTTGGTAGTGAAGAAATGTTTCTATAAATA 1715  
 \*\* \*\*\*\*\*

NbAGO1-1H CTGTGCTCTGAAAGAAACAGAAAAAGTCTATCCGCTTTTAAATCACAACAAAC---- 1770  
 NbAGO1-1L CTGTGCTCTGAAAGAAACAGAAAAATCTATCCGCTTTTAAATCACAACAAACAA 1775  
 \*\*\*\*\*

NbAGO1-1H -----  
 NbAGO1-1L CAACTACTACCCAGTATAGTCCCACAAAGTGGGGTCTGGGGAGGATAATGTAGACGGG 1835

NbAGO1-1H -----  
 NbAGO1-1L CCTTACCCTACCCGAAAGGCAGAGAGGCTGTTCCAATGACCCCTCGGCTCAGTGAAG 1895

NbAGO1-1H -----  
 NbAGO1-1L GAAAGGAACAACAAAAACAAAAACAACAAGAACATTAGTACTCAGCAGAAATA 1955

NbAGO1-1H -----  
 NbAGO1-1L GCCTAAATAATATCTAAGCATAAGAACATAAATAAATAGCATGCAATAATACCAAC 2015

NbAGO1-1H -----CCAGTCGAAAGTAGTGTACCCATTTCTCTC 1800  
 NbAGO1-1L AGTCACTACCATAAATAACACACAACAATCCAGTCGAAAGAGTGTACCCATTTCTCTC 2075  
 \*\*\*\*\*

NbAGO1-1H CTGTGCGCTTGTGTTGAATTGAATTCAAATTAAGTTGCTCTTGTAGGAGTGAATAGTTT 1860  
 NbAGO1-1L ATGTGCTCTTGTGTTGAATTGAATTCAAATTAAGTTGCTCTTGTAGGAGTGAATAGTTT 2135  
 \*\*\*\*\*

NbAGO1-1H TATTTTGTGTTGTTTGTGCTCTGAGAAATGGAATATATGAGGTTTACCCTTTTGT 1920  
 NbAGO1-1L TATTTTGTGTT--TTGGGCTCTGAGAAATGGAATATATGAGGTTTACGCTTTTGT 2193  
 \*\*\*\*\*

NbAGO1-1H GCCCGCTAATGCGTTCTCTTTGATCATCAAATAATATGCTAAAACCTGGACATGTTT 1980  
 NbAGO1-1L GCCCGCTAATGCGTTCTCTTTGATCATCAAACA--TGTCTAAAACCTGGACATGTTT 2251  
 \*\*\*\*\*

NbAGO1-1H TCTGTGAATCAAAGATGAATCTAGTGAAACCTTTTGTGTTAGAGCTTGTGCTGCATAAG 2040  
 NbAGO1-1L TCTTTGAATCATAGATGAATCTAGTGAAACCTTTTATTTAGGAGCTTGTGCTGCATAAG 2311  
 \*\*\*\*\*

NbAGO1-1H ATTATCCAGTGGATCTTTTGTGCTGTTGCAATAAAGTGGCTTGCTTGAACACATGC 2100  
 NbAGO1-1L ATTATCAGTGGATCTTTTGTGCTGTTGCAATAAAGTGGCTTGCTTGAACCCCTGC 2371  
 \*\*\*\*\*

NbAGO1-1H ACACGGATGTTAAGTTTGTGATTTATGGGGTTCAGCAGAGATGTTTGGTTT--GTGA 2157  
 NbAGO1-1L ACATGGATGTTTGTGATTTATAGGGTTCAGCAGATAGATGTTTGTGTTTGTGTA 2431  
 \*\*\*\*\*

NbAGO1-1H TTTATGGGGTTCGGATCTGGAGCCTATAAGTTATCTTGGGCTCGTAGATTGGTATCA 2217  
 NbAGO1-1L TTTATGGAGTTCTGGATCTGGAGCCTATAAGTTTCTTAGGCTCGTAGATTGGTATCA 2491  
 \*\*\*\*\*

NbAGO1-1H GATACAGCAGCAGATATGCTTTTCGACGAGTATTATAATTGTCTTGGGAAAATGC 2277  
 NbAGO1-1L GATACAGCAGCAGATACACTTTTTCGACGAGTATTATAATTGT--CTTGGGAAAATGC 2549  
 \*\*\*\*\*

NbAGO1-1H TGTGATCTCTTGAACATTTT--AAGTATAATCGTCTTGGGTTGTTGTAGTTATTACC 2336  
 NbAGO1-1L TGTGATCTCTTGAACATTTTAAAGTATAATCGTCTTGGGTTGTTGTAGTTATTACC 2609  
 \*\*\*\*\*

**CODING region**

NbAGO1-1H ATGGTCCGGAAGAAGAGAACTGATGTTCTGGTGGTCTGAGAGTTTGGAGTCCCATGAA 60  
 NbAGO1-1L ATGGTCCGGAAGAAGAGAACTGATGTTCTGGTGGTCTGAGAGTTTGGAGTCCCATGAA 60  
 \*\*\*\*\*

NbAGO1-1H ACTGGATGGGGACGAGGTGGTGCCTCAACGGCCATCAAGCAGCAGCAACATCAGCATCAG 120  
 NbAGO1-1L ACTGGAGGGGACGAGGTGGTGCCTCAACGGCCATCAAGCAGCAGCAACATCAGCATCAG 120  
 \*\*\*\*\*

NbAGO1-1H CAAGGTGGAGGAAGAGGCTGGGCACCTCAGCATGGAGGACATGGTGGCCGTGGTGGTGG 180  
 NbAGO1-1L CAAGGCGGAGGAAGAGGCTGGGCACCTCAGCATGGAGGACATGGTGGCCGTGGTGGTGG 180  
 \*\*\*\*\*

NbAGO1-1H GGACTCCACGTGGTGAATGGCCCTCAACAGTCTATGGTGGACCTTCTGAATACTAC 240  
 NbAGO1-1L GGACTCCACGTGGTGAATGGCCCTCAACATCTATGGTGGACCTCTGAATACTAC 240  
 \*\*\*\*\*

NbAGO1-1H CAACAGGGCAGGGGAACCCAGCAGTATCAACGAGGTGGAGGCAACCCAGCGCGTGGT 300  
 NbAGO1-1L CAACAGGGCAGGGGAACCCAGCAGTATCAACGAGGTGGAGGCAACCCAGCGCGTGGT 300  
 \*\*\*\*\*

18nt INDEL  
 NbAGO1-1H GGCATGGGTGGCCATGGGGCACCTCTGTGGCCCTCCTCGGCCACCCAGTACCCGAGCTG 360  
 NbAGO1-1L GGCATGGGGGGCCGTGGGGCAC-----GGCCACCCAGTACCCGAGCTG 342  
 \*\*\*\*\*

NbAGO1-1H CACCAAGCAACCCAGACTCAACATCAGCCTGTACCATATGGAAGCCATCAGAAACATAC 420  
 NbAGO1-1L CACCAAGCAACCCAGACTCAACATCAGCCTGTACCATATGGAAGCCATCAGAAACATAC 402  
 \*\*\*\*\*

NbAGO1-1H TCGAGGCTGGTTCTCTGCTCAGCCACCCGAAACCAACGACACAGCAAGTACTCAGCA 480  
 NbAGO1-1L TCGAGGCTGGTTCTCTGCTCAGCCACCTGAAACCAACGACACAGCAAGTACTCAGCA 462  
 \*\* \*\*\*\*\*

NbAGO1-1H TTCCAGCAACTTGTGTGACGCGAAGCAGGTGCAACCCAAAGCAATACAACCCAGCATCG 540  
 NbAGO1-1L TTCCAGCAACTTGTGTGACGCGAAGCAGGTGCAACCCAAAGCAATACAACCCAGCATCG 522  
 \*\*\*\*\*

NbAGO1-1H AGCAAGTCGATGAGGTTTCCACTCCGGCCAGGAAAGGGTAGTACTGGTATTAGATGCATA 600  
 NbAGO1-1L AGCAAGTCGATGAGGTTTCCACTCCGGCCAGGAAAGGGTAGTACTGGTATTAGATGCATA 582  
 \*\*\*\*\*

NbAGO1-1H GTTAAGGCCAATCACTTCTTTCGCGAGTTACCTGACAAAGATCTGCACCAGTATGATGTG 660

NbAG01-1L GTTAAGGCCAATCACTTCTTTGCCGAGTTACCTGACAAAAGATCCACCAGTATGATGTG 642  
 \*\*\*\*\*  
 NbAG01-1H AGTGTCAAGCGTTGATAAGTGTCTAGTTATGATCTTCTTTATATTAATCTAATGAGGG 720  
 NbAG01-1L AGTGTCAAGCGTTGATAAGTGTCTAGTTATGATCTTCTTTATATTAATCTAATGAGGG 702  
 \*\*\*\*\*  
 NbAG01-1H TCTATCTTGATAAATGGCTTGTGCATCTTTCTAATGGCTTTCAGGTTTCAATTACTCTGA 780  
 NbAG01-1L TCTATCTTGATAAATGGCTTGTGCATCTTTCTAATGGCTTTCAGGTTTCAATTACTCTGA 762  
 \*\*\*\*\*  
 NbAG01-1H GGTCCCTCTCGGGGTCAACCGGCTGTCAATGGAGCAGCTGGTGAAGCTTTATAGAGA 840  
 NbAG01-1L GGTCCCTCTCGGGGTCAACCGGCTGTCAATGGAGCAGCTGGTGAAGCTTTATAGAGA 822  
 \*\*\*\*\*  
 NbAG01-1H ATCCCATCTGGGAAGAGGCTTCCAGCCTATGACGGAAGAAAAGTCTATACACAGCAGG 900  
 NbAG01-1L ATCCCATCTGGGAAGAGGCTTCCAGCCTATGACGGAAGAAAAGTCTATACACAGCAGG 882  
 \*\*\*\*\*  
 NbAG01-1H GCCCCTCCCTTTTGTCAAAGGATTTAAAATCACTCTAATTGATGATGATGATGACC 960  
 NbAG01-1L ACCCCTCCCTTTTGTCAAAGGATTTAAAATCACTCTAATTGATGATGATGATGACC 942  
 \*\*\*\*\*  
 NbAG01-1H TGGTGGTGTAGGTGTGCTCCAGGTTTGGAGAAATCAGATTCAATTTTAGCAATATT 1020  
 NbAG01-1L TGGTGGTGTAGGTGTGCTCCAGGTTTGGAGAAATCAGATTCAATTTTAGCAATATT 1001  
 \*\*\*\*\*  
 NbAG01-1H TAAATATCCCTTTTCTAATTTGTGTTGCGAGGAGGAAAGAGAGTTTAAAGTTGTGATC 1079  
 NbAG01-1L TAAATATCCCTTTTCTAATTTGTGTTGCGAGGAGGAAAGAGAGTTTGAAGTTGTGATC 1061  
 \*\*\*\*\*  
 NbAG01-1H AAGCTGGCGGCTCGTGTGATCTTCACTACTGGGATGTTCTTACAAGGAGAGCAGGCT 1139  
 NbAG01-1L AAGCTGGCGGCTCGTGTGATCTTCACTACTGGGATGTTCTTACAAGGAGAGCAGGCT 1121  
 \*\*\*\*\*  
 NbAG01-1H GATGACCCGAAGAAGCACTTCAAGTGTGGATATTGTGCTACGCGAGTTGCCAACATCT 1199  
 NbAG01-1L GATGACCCGAAGAAGCACTTCAAGTGTGGATATTGTGCTACGCGAGTTGCCAACATCT 1181  
 \*\*\*\*\*  
 NbAG01-1H AGGTATGGTCTTGAAGTCTATAATATCTGTTGTCACAAAATATGAATCCTTCTCAA 1259  
 NbAG01-1L AGGTATGGTCTTGAAGTCTATAATATCTGTTGTCACAAAATATGAATCCTTCTCAA 1241  
 \*\*\*\*\*  
 NbAG01-1H TGATTTATTTATTTATCTTTCCCTTTATCACGGTTGACTGAGTATTGTCCTGTGGG 1319  
 NbAG01-1L TGATTTATTTATTTATCTTTCCCTTTATCATGTTGACTGAGTATTGTCCTGTGGG 1301  
 \*\*\*\*\*  
 NbAG01-1H CCGCTCTTCTATTCCCTCAATTTAGGACGAAGACAACCACTGGTGAAGTTTAGAGAG 1379  
 NbAG01-1L CCGCTCTTCTATTCCCTCAATTTAGGACGAAGACAACCACTGGTGAAGTTTAGAGAG 1361  
 \*\*\*\*\*  
 NbAG01-1H CTGGCGTGGCTTCTATCAAAGTATTCGTCTACACAGATGGGATTATCCCTGAATATTGG 1439  
 NbAG01-1L CTGGCGTGGCTTCTATCAAAGTATTCGTCTACACAGATGGGATTATCCCTGAATATTGG 1421  
 \*\*\*\*\*  
 NbAG01-1H TCAGCACAATTTTCATGACTTTGTTAAATCTGGTTTTGTGCTGATTAGTAGAAGT 1499  
 NbAG01-1L TCAGCACAATTTTCATGACTTTGTTAAATCTGGTTTTGTGCTGATTAGTAGAAGT 1481  
 \*\*\*\*\*  
 NbAG01-1H AGTAACTGATGGCAGTCAAGCTCAGTACTTTTACCATAATGC----- 1542  
 NbAG01-1L AGTAACTGATGGCAGTCAAGCTCAGTACTTTTACCATAATGC----- 1541  
 \*\*\*\*\*  
 NbAG01-1H -----  
 NbAG01-1L GGTTTTTGTAGCTTGATTGATGAGAACTAGTAACTGATTGCCAGTCAAGCAGTACTTT 1601  
 \*\*\*\*\*  
 NbAG01-1H -----TTGCTGTACTGAGTACACATTCTCATCATTGTGCACTTTGTATATT 1591  
 NbAG01-1L TGCCATAATGCTGTCTGTACTGAGTACACATTCTCATCATTGTGCACTTTGTATATT 1661  
 \*\*\*\*\*  
 NbAG01-1H GGTGAACAGATATGCTTCCACGGCTTTCATTGAGCCAAGCCGATTATTGACTTCGTG 1651  
 NbAG01-1L GGTGAACAGATATGCTTCCACGGCTTTCATTGAGCCAAGCCGATTATTGACTTCGTG 1721  
 \*\*\*\*\*  
 NbAG01-1H AGCCAGTCTTGAATCGGATATCTCTTAGACCACTGTCTGATGCTGACCCGCTTAAG 1711  
 NbAG01-1L AGCCAGTCTTGAATCGGATATCTCTTAGACCACTGTCTGATGCTGACCCGCTTAAG 1781  
 \*\*\*\*\*  
 NbAG01-1H GTGGTTTGACACTTGACATTCTTATTCATGATTATGTCATAATCTATCGAATTTCT 1771  
 NbAG01-1L GTGGTTTGACACTTGACATTCTTACGATGATTGTGTCATAATCTATCGAATTTCT 1841  
 \*\*\*\*\*  
 NbAG01-1H ACTGTTGCCAGTGATTGACTCGATACTTGGATTCTCAAATATAGGTCATTACATT 1831  
 NbAG01-1L ACTGTTGCCAGTGATTGACTCGATACTTGGATTCTCAAATATAGGTCATTACATT 1901  
 \*\*\*\*\*  
 NbAG01-1H TTTCTTTCAGGTTATTGGCTACTTTTGTCTTAACTTCACTGAACTGAGATAAAGAAG 1891  
 NbAG01-1L TT-CTTTCAGGTTATTGGCTACTTTTGTCTTAACTTCACTGAACTGAGATAAAGAAG 1960  
 \*\*\*\*\*  
 NbAG01-1H CACTGAGAGGTGTAAGGTGGAGGTCATCTGTTGAAATATGCGGAGGAAGTATCGCA 1951  
 NbAG01-1L CCTGAGAGGTGTAAGGTGGAGGTCATCTGTTGAAATATGCGGAGGAAGTATCGCA 2020  
 \*\*\*\*\*  
 NbAG01-1H TTTCTGGCTTGAAGTCTCAAGCAACAAGAGAGTTGACGATGATCTGGCTTAGTATAAT 2011  
 NbAG01-1L TTTCTGGCTTGAAGTCTCAAGCAACAAGAGAGTTGACGATGATCTGGCTTAGTATAAT 2080  
 \*\*\*\*\*  
 NbAG01-1H TATGATATTACTTTTCTCTGTTTATATCCAGCTTGGACATAAACCTTTTACATTGG 2071  
 NbAG01-1L AATGATATTACTTTTCTCTGTTTATATCCAGCTTGGACATAAACCTTTTACATTGG 2140  
 \*\*\*\*\*  
 NbAG01-1H ATTATATATAGGTGTAATAGTGGTGTGCTTCTGTTCTTTAATGTTCTGCTGCTATA 2131  
 NbAG01-1L ATTATATATAGGTGTAATAGTGGTGTGCTTCTGTTCTTTAATGTTCTGCTGCTATA 2199  
 \*\*\*\*\*  
 NbAG01-1H TGTGGGATTTTCTCATCGTGAATCTTGTCTTTTATTTGTTTGGGCAAGTTTCTGCTC 2191  
 NbAG01-1L -GTGGGATTTTCTCATCGTGAATCTTGTCTTTTATTTGTTTGGGCAAGTTTCTGCTC 2258  
 \*\*\*\*\*  
 NbAG01-1H GATGAAAGGGGTACGATGAAAGCTGTTGTGGAATATTTGGGAAACCTATGGTTTGTG 2251  
 NbAG01-1L GATGAAAGGGGTACGATGAAAGCTGTTGTGGAATATTTGGGAAACCTATGGTTTGTG 2318  
 \*\*\*\*\*  
 NbAG01-1H ATTCGCATACCCAGTGCCTTGTCTTCAAGTTGGAATACGACAGGCCAAATTAATTG 2311  
 NbAG01-1L ATTCGCATACCCAGTGCCTTGTCTTCAAGTTGGAATACGACAGGCCAAATTAATTG 2378

```

*****
NbAG01-1H CCAATGGAAAGTAGGTGCCTTTCTCATTGATAACTAGTCTTTTCTAAGTATCTTGTGTATT 2371
NbAG01-1L CCAATGGAAAGTAGGTGCCTTTCTCATTGATAACTAGTCTTTTCTAAGTATCTTGTGTATT 2438
*****

NbAG01-1H TTATGTGCTTACATATCTTGTAGTCCAGGTATGTAAGATTGTGGAGGACAGAGATACTCA 2431
NbAG01-1L TTATGTGCTTACATATCTTGTAGTCCAGGTATGTAAGATTGTGGAGGACAGAGATACTCA 2498
*****

NbAG01-1H AAGCGCTTGAATGAGAGGACAGATAACAGCACTTCTAAAAGTGACCTGCCAGCGTCCCTCAA 2491
NbAG01-1L AAGCGCTTGAATGAGAGGACAGATAACAGCACTTCTAAAAGTGACCTGCCAGCGTCCCTCAA 2558
*****

NbAG01-1H GAGAGAGAACGTGATATTCTTCAGGTTGGATCTTGCTTCTGAACTGTTCTATTACTCT 2551
NbAG01-1L GAGAGAGAACGTGATATTCTTCAGGTTGGATCTTGCTTCTGAACTGTTCTATTACTCT 2618
*****

NbAG01-1H TATCCTAATAATGAGGTTCTGAGCCAATGTGTAATCTGTATGTTATGTCCTTTTGTG 2611
NbAG01-1L TATCCTAATAATGAGGTTCTGAGCCAATGTGTAATCTGTATGTTATGTCCTTTTGTG 2678
*****

NbAG01-1H TTAATGTTTTATGTGAACCTTGACGTAGCTATCTTCTTTGTTAAGTTTTATGCTCTG 2671
NbAG01-1L TTAATGCTTTTATGTGAACCTTGACGTAGCTATCTTCTTTGTTAAGTTTTATGCTCTG 2738
*****

NbAG01-1H TTTGATGTACCAGTTATGGTATTTTTGAGAAGGATGCACACATATAAATTTGTTTGT 2731
NbAG01-1L TTTGATGTACCAGTTATGGTATTTTTGAGAAGGATGCACACATATAAATTTGTTTGT 2798
*****

NbAG01-1H CAATGATGCTGAGTAAAGGCTTCTCTATGGTGAGGAGGAACCAATGAGAGTATGGTAA 2791
NbAG01-1L CAATGATGCTGAGTAAAGGCTTCTCTATGGTGAGGAGGAACCAATGAGAGTATGGTAA 2858
*****

NbAG01-1H TAAATTTCCAAGATTTTCC - GTGGTCAATGGCGAATGCAGAATTTTCCAAGTAGTGT 2850
NbAG01-1L TAAATTTCCAAGATTTTCCCGTGGTCAATGGCGAATGCAGAATTTTCCAAGTAGTGT 2918
*****

NbAG01-1H CATATTTAAATAAATAACACA -- AATACAAATGTTGTAAGGAAGTATGTAATTTAAA 2908
NbAG01-1L CATATTTAAATAAATAACACAATAAATAAATGTTGTAAGGAAGTATGTAATTTAAA 2978
*****

NbAG01-1H GAAATTTTAAAAAAA -- GAAAGCAAAAGGAAAGAAAAGAACTATAACCTTTGTCAAGT 2966
NbAG01-1L GAAATTTAAAAAAAAGAAAGCAAAAGGAAAGAAA - AACTA - AACCTTTGTCAAGT 3036
*****

NbAG01-1H AAAGATGACCAATGGCAAGATTGGTAGTATATGACAGAGGGGTGCCAGTCCAAAAG 3026
NbAG01-1L AAAGATGACCACTTAGCAAGATTGGTGTATATGACAGAGGGGTGCCAGTCCCTGAAG 3096
*****

NbAG01-1H TATTTAAATGAATTTGCTAAAAGGAAAAATAAGGCAAAAT - TACAGCAGGAAGAATTGAT 3085
NbAG01-1L TATTTAAATGAATTTGCTAAAAGGAAAAATAAGGCAAAATATACAGCAGGAAGAATTGAT 3156
*****

NbAG01-1H CTTGTAACCTCCCGGATAAAACGTAGCATCTCTC - - - - -TTGCCAGACAAAT 3135
NbAG01-1L CTTGTAACCTCCCGGATAAAACGTAGCATCTCTC - - - - -TTGCCAGACAAAT 3216
*****

NbAG01-1H TTGTTGCCAAGTGGTGTATCCATTAATATCAGAATTTTT - - - - -TT - - - - - 3179
NbAG01-1L T - GTTGTCAAGTGGTGTATCCATTAATATAGAAATTTTTAATGTTCAATAATTTAAAA 3275
*****

NbAG01-1H - - - - -ATGTTGAGATA - ACATATATATAA - - - - - 3203
NbAG01-1L AATATATATACACATGATATATATATATATATATATATATATATATATATATATA 3335
*****

NbAG01-1H - - - - -ATAAATTTTCATCGAACCGG 3224
NbAG01-1L CATGTGTGTATATATATATATACACATGATATATATATAAATAAATTTTCATCGAACCGG 3395
*****

NbAG01-1H TGTACATGACCCCGCTTCATCCAATATAAATCTACCCCTGCCGTGGTTTTAGTTAAT 3284
NbAG01-1L TGTACATGACCCCGCTTCATCCAATATAAATCTACCCCTGCCGTGGTTTTAGTTAAT 3455
*****

NbAG01-1H AAATGTAGAATCTGGCAAGGGAATGGCAATGAGTACCAGTATGATTTAGTGTGTTT 3344
NbAG01-1L AAATGTAGAATCTGGCAAGGGAATGGCAATGAGTACCAGTATGATTTAGTGTGTTT 3514
*****

NbAG01-1H TATGGTGTACGAAGTGTGGTTTATTTGGTAAAAGGGTTGAATTTAGTTAGTAGAGTGT 3404
NbAG01-1L TATGATGATACGAAGTGTGGTTTATTTGGTAAAAGGGTTGAATTTAGTTAGTAGAGTGT 3574
*****

NbAG01-1H TCATTTGATACAATGCTGGTTCGTAATGTACATGTAATGTGATCATAGCAGAACA 3464
NbAG01-1L TCATTTGATACAATGCTGGTTCGTAATGTACATGTAATGTGATCATAGCAGAACA 3634
*****

NbAG01-1H CTTTCAAGTTGTCGTGGTCAAATGTTTACAATGAGATCTTTTATGA - AAGCTTAGTGGG 3523
NbAG01-1L CTTTCAAGTTGTCGTGGTCAAATGTTTACAATGAGAT - TTTATGCAAGCTTAATGGG 3693
*****

NbAG01-1H AACACTCTTACAGGATAAATTT - GTTGTGTTGGGCTTGTACTGATACTCCTTGG 3581
NbAG01-1L AACACTCTTACAGGATAAATTTGTTGTGCTGGCTTGTACTGATACTCCTTGG 3753
*****

NbAG01-1H TAGTCAAGGATTTCACTGATTGCTTTAGTGTGTTTTCTCGGGCAAACTTTCCATCTTGC 3641
NbAG01-1L TAGTCAAGGATTTCACTGATTGCTTTAGTGTGTTTTCTCGGGCAAACTTTCCATCTTGC 3809
*****

NbAG01-1H TCTTCTGCATATTTTCAGGCTAATTTTCAGGCTTTTTCAGGCTTATCTGTATTAC 3701
NbAG01-1L TCTTCTGCATATTTTCAGGCTAATTTTCAGGCTTTTTCAGGCTTATCTGTATTAC
-----

NbAG01-1H AATCTATATTTTTTCCATCTTACACTTCTGCTGATTTTTTCAGTATAAATTCAGGCC 3761
NbAG01-1L AATCTATATTTTTTCCATCTTACACTTCTGCTGATTTTTTCAGTATAAATTCAGGCC 3845
*****

NbAG01-1H TTTTGAAGTGTATCTGTATTTAAAACTAATACTTCTTTTATTAGACTGTTTCATCAC 3821
NbAG01-1L TTTTGAAGTGTATCTGTATTTAAAACTAATACTTCTTTTATTAGACTGTTTCATCAC 3905
*****

NbAG01-1H AATGCTTATGCTGATGACCATATGCGAAGGAGTTGGTATTAAAGTCACTGAGAAGCTT 3881
NbAG01-1L AATGCTTATGCTGATGACCATATGCGAAGGAGTTGGTATTAAAGTCACTGAGAAGCTT 3965
*****

NbAG01-1H GCTCAAGTTGAGGCTCGCGTTTTCGCTGCACCTTGGGTAAGTTGAAGCTTCTCTAGTTT 3941
NbAG01-1L GCTCAAGTTGAGGCTCGCGTTTTCGCTGCACCTTGGGTAAGTTGAAGCTTCTCTAGTTT 4025

```

```

*****
NbAGO1-1H GTTTGGTGTCATGTGATTGAGGTTGATGCTATACTAATCCTTCTGATATAAGATA 4001
NbAGO1-1L GTTTGATGTGATCATGTGATTGAGGTTGATTATACTAATCCTTCTCAATTA-GATA 4084
*****

NbAGO1-1H TTCT--TGCTGCAGATCTTTGCTTTTGTGAATTAAGCTTATTGTAGGATTGTGAAATTAT 4059
NbAGO1-1L TTCTCTGCTGCAGATCTTTGCTTTGCTGAATTAAGCTTATTATAGGATTGTGAAATTAT 4144
**** *****

NbAGO1-1H TTTAATGTTCTGCAGCTTAAATACCATGATACAGGTGAGAGAAAGACTGTCGCCAC 4119
NbAGO1-1L TTTAATGTTCTGCAGCTTAAATACCATGATACAGGTGAGAGAAAGACTGTCGCCCG 4204
*****

NbAGO1-1H AAGTGGCCAGTGGAAATATGATGAATAAGGTAAGTAACTGAAAGTGCATAGTCGAGATTCCTG 4179
NbAGO1-1L AAGTGGCCAGTGGAAATATGATGAATAAGGTAAGTAACTGAAAGTGCATAGTCGAGAT--- 4259
*****

NbAGO1-1H TAGTTGGTTGACTGTCATTTCTATGAGATAAATACCATTGATTTTGTGTGGTCTT 4239
NbAGO1-1L -----AACGTATG----- 4267
*****

NbAGO1-1H TCAAGATTGCCGTGGTTTGCCACTGAACACTAATCTTTAGGCTTTGCTTATATATAGT 4299
NbAGO1-1L -----TTGCT----- 4272
*****

NbAGO1-1H TTAGCTGTCTGCTGGCTTTGGCACTTGTACTGTCATGTAGCTTATGACAAAATACC 4359
NbAGO1-1L --AGCT-----TGCTACC-----CAAA----- 4287
****          ****          ****

NbAGO1-1H TAACCTTAAGGAACCTCCAGTTGTTGTTTGTGCTTCTTTTTGTATCTGTAATAAT 4419
NbAGO1-1L -----GATATTGAAA----- 4297
**** * * *

NbAGO1-1H CCTAGAGCAATACAACCTCATTTATATGTTGTTGTAAGTGTAGTTGGGTACTTTTTA 4479
NbAGO1-1L -----TGCCG-----TAGT----- 4306
**** * * *

NbAGO1-1H TTACTAATTCAAGACCATTGAATTTGCTCCCTTACTGATGAGAGATAGAAATCCA 4539
NbAGO1-1L -----AATC----- 4310
****

NbAGO1-1H TTTTCTGATTCCGTTGTTTCCGTCGTATGATTATCATGACGCTCGATCCATCTACTT 4599
NbAGO1-1L -----

NbAGO1-1H AGCTGCACCTTAGGATGATATAGCCCTAAAAGTGAATAGTGGGTTCAAACAGGAAAA 4659
NbAGO1-1L -----AATGAACAGCC-----AGAGGG----- 4328
**** * * *          * * *

NbAGO1-1H CCTAAGTATTGGCACCACAGTACATTGAAATGGTGTAGTAAATGCCATGTGATTTGCT 4719
NbAGO1-1L -----TTGCCATGTCTATTGCT----- 4346
*****

NbAGO1-1H ACTCTGTTTGGATTTTCCGACAGTGTGGA-GCTTTAATTAATTAATCTTTCGCTTATTA 4778
NbAGO1-1L ACTCTGTTTGGATTTTCCGACAGTGTGGAATGCTTAAATTAATTAATCTTTCGCTTATTA 4406
*****

NbAGO1-1H TTTTGCAGCAAAATGTTAATGGAGGACAGTGAACAACCTGATCTGTAACTTTTC 4838
NbAGO1-1L TTTTGCAGCAAAATGTTAATGGAGGACAGTGAACAACCTGATCTGTAACTTTTC 4466
** *****

NbAGO1-1H TCGCAATGTGCAAGACACAGTTGCACGTGGAATTTGTTCCGAGCTTGCACAAATGTGCAT 4898
NbAGO1-1L TCGCAATGTGCAAGACACAGTTGCACGTGGAATTTGTTCCGAGCTTGCACAAATGTGCAT 4526
*****

NbAGO1-1H GATATCCGGAATGTAATTAGCAAGTCCAGTTCGCCCTTTTCTCCCTGTACTTATT 4958
NbAGO1-1L GATATCCGGAATGTAATTAGCAAGTCCAGTTCGCCCTTTTCTCCCTGTACTTATT 4586
*****

NbAGO1-1H GATGATCCGAGATATACAGTTCAGCAAGTTCAGTTCAGTTCAGTTCAGTTCAGTTCAG 5018
NbAGO1-1L GATGATCCGAGATATACAGTTCAGCAAGTTCAGTTCAGTTCAGTTCAGTTCAGTTCAG 4646
**** *****

NbAGO1-1H CCTGTTTACCACCACTGAGTGTCTCCGCCTGATCAAGTTGAGAGGTCTTGAAACTCGA 5078
NbAGO1-1L CCTGTTTACCACCACTGAGTGTCTCCGCCTGATCAAGTTGAGAGGTCTTGAAACTCGA 4706
*****

NbAGO1-1H TTTCAGATGCTATGACAAAGTTGACGCAAAATGGGAGAGAGCTAGATCTTTTGTATTGT 5138
NbAGO1-1L TTTCAGATGCTATGACAAAGTTGACGCAAAATGGGAGAGAGCTAGATCTTTTGTATTGT 4766
*****

NbAGO1-1H ATATTACCAGACAAATACGGCTCTCTTTATGTTGTTACAGCTGAAATGTTGAAATCTTAT 5198
NbAGO1-1L ATATTACCAGACAAATACGGCTCTCTTTATGTTGTTACAGCTGAAATGTTGAAATCTTAT 4810
-----TCATAG-----
****

NbAGO1-1H GGTGCTTTGCAAACTCCTGGAATATGCTACAGCTGAAATTTTACTTCTTTTCTTAGG 5258
NbAGO1-1L GGTGCTTTGCAAACTCCTGGAATATGCTACAGCTGAAATTTT-ACTTCTTTTCTTAGG 4869
*****

NbAGO1-1H TGATCTAAACGGATTTGTGAAACTGAACTGGAATTTGTCTCACAATGCTGCTTGACAAA 5318
NbAGO1-1L TGATCTAAACGGATTTGTGAAACTGAACTGGAATTTGTCTCACAATGCTGCTTGACAAA 4929
*****

NbAGO1-1H ACATGATTTAAGATGAGCAAGCAGTATTAGCTAAATGTATCCTGAAAGTAAATGTGAA 5378
NbAGO1-1L ACATGATTTAAGATGAGCAAGCAGTATTAGCTAAATGTATCCTGAAAGTAAATGTGAA 4989
*****

NbAGO1-1H GGTGAGGAGAAATACTGTGCTGTTGATGCGCTCTTAGAGCAATCCCTGTCAG 5438
NbAGO1-1L GGTGAGGAGAAATACTGTGCTGTTGATGCGCTCTTAGAGCAATCCCTGTCAG 5049
*****

NbAGO1-1H CGACCCCACTACTATCTTTGTTGTCAGATGTCCCATCCCCACCCTGGGGAGGATTC 5498
NbAGO1-1L CGACCCCACTACTATCTTTGTTGTCAGATGTCCCATCCCCACCCTGGGGAGGATTC 5109
*****

NbAGO1-1H TAGCCGTCATTTGCTGCGGTAAAAGCTGTAGACTTCACTCTTTGGTTTTCATGAATCCA 5558
NbAGO1-1L TAGCCGTCATTTGCTGCGGTAAAAGCTGTAGACTTCACTCTTTGGTTTTCATGAATCCA 5169
*****

NbAGO1-1H CTCCTTCATCTAATATCTGAAGCAAAGAAGTCTAACTTTTCATCTTTTCAG---- 5618
NbAGO1-1L CTCCTTCATCTAATATCTGAAGCAAAGAAGTCTAACTTTTCATCTTTTCAGTTGTT 5229
*****

NbAGO1-1H ----- 5655
NbAGO1-1L TCGTCTCAAGATTGGCCTGAAATCAAGTATGCTTGTGTAGACTTCACTCTTTG 5289

```

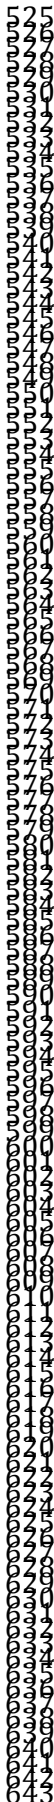

\*\*\*\*\*

NbAG01-1H ----- 5349  
NbAG01-1L GTTTCACGAATCCCACTCCCTTCATCTATATATCTGAAGCAAAGAAGCGCTAACTTTTCAT

NbAG01-1H -----GTGGTGTCTCTCAAGATTGGCCTGAAATTCAAAAGTATGCTGTTTGGTT 5664  
NbAG01-1L ATCTTTTCAGGTGGTGTCTCTCAAGATTGGCCTGAGATTACAAAAGTATGCTGTTTGGTT 5409  
\*\*\*\*\*

NbAG01-1H TCTGCTCAAGCGCATAGGCAAGAGCTTATCAAGATCTGTACAAGACTTGGCAAGATCCA 5724  
NbAG01-1L TCTGCTCAAGCGCATAGGCAAGAGCTTATCAAGATCTGTACAAGACTTGGCAAGATCCA 5469  
\*\*\*\*\*

NbAG01-1H GTTAGAGGACCTGTGACTGGTGGCATGATAAAGTATT--GCCTTTTCTTCTCTTATTT 5782  
NbAG01-1L GTGAGAGACCTGTACTGGTGGCATGATAAAGTATTCCGCTTTTCTTCTCTTATTT 5529  
\*\* \*\*\*\*\*

NbAG01-1H CAAGGAACATGTCTTGATTTCAAGTTCAAGCTAATGGACTTAATTTGCTTCTGACTG 5842  
NbAG01-1L CAAGGAACATGTCTTGATTTCAAGTTCAAGCTAATGGACTTAATTTGCTTCTGACTG 5589  
\*\*\*\*\*

NbAG01-1H ATGGTCTATCTCACTTATAACTCAGGGAATTACTTATTTCCCTCCGTCGAGCAACTGGAC 5902  
NbAG01-1L ATAGTCTATCTCACTTATAACTCAGGGAATTGCTTATTTCCCTCCGTCGAGCAACTGGAC 5649  
\*\* \*\*\*\*\*

NbAG01-1H AGAAGCCGACAGAAATTATTTCTACAGCTATTGTTGAATAAGCCTTCTATACCTGCATT 5962  
NbAG01-1L AGAAGCCGACAGAAATTATTTCTATAGCTATTGTTGAATAAGCCTTCTATACCTGCATT 5709  
\*\*\*\*\*

NbAG01-1H ATAAAAATTTCTGTTCCCTTTG----- 5984  
NbAG01-1L ATAGAAATTTCTGTTCCCTTTGTTGCTGAAATGGATTATCTTTTCCCTTCAGATATGGT 5769  
\*\* \*\*\*\*\*

NbAG01-1H -----TGCTAAAATGAATTATCCTTTTCCCTTCAG 6015  
NbAG01-1L TTAGCATTATAGAAATTTCTGTTCCCTTTGTTGCTGAAATGGATTATCCTTTTCCCTTCAG 5829  
\*\*\*\*\*

NbAG01-1H AGATGGTGTAGTGAAGGCAATTTTACCAAGTCTTCTTTTGAACCTTGATGCAATCCG 6075  
NbAG01-1L AGATGGTGTAGTGAAGGCAAGTTTATCAAGTCTTCTTTTGAACCTTGATGCAATCCG 5889  
\*\*\*\*\*

NbAG01-1H CAAGGTATTTCCCTTCTGTTATACCTTACTCTGCCTGTTTACTATAAATCTGGATTG 6135  
NbAG01-1L CAAGGTATTTCCCTTCTGTTATACCTTACTCTGCCTGTTTACTATAAATCTGGATTG 5949  
\*\*\*\*\*

NbAG01-1H TCT--ATTTTTGGACCATGAATATGGGTAGAAAAAGCTTGCCTTTTATTTGTTAG 6193  
NbAG01-1L TCTCTATTTTCTGGACCATGAAGATGGGTAGAAAAAGCTTGCCTTTTATTTGTTAG 6009  
\*\* \*\*\*\*\*

NbAG01-1H AAGGTATGAACCTGACTGAACCCAATTAGGCAATGTCATCTTTAGAACCCTACTATCAG 6253  
NbAG01-1L AAGGTATGAACCTGACTGAACCCAATTAGGCAATGTCATCTTTAGAACCCTACTATCAG 6069  
\*\*\*\*\*

NbAG01-1H CCCCCGTACGTTTGTGTGGTCCAGAAACGGCATCATACTAGGTTGTTGCCAATAAC 6313  
NbAG01-1L CCCCCGTACATTGTTGTGGTCCAGAAACGTCATCATACTAGGTTGTTGCCAATAAC 6129  
\*\*\*\*\*

NbAG01-1H CACCACGACAGAAATGCAGTTGATCGGAGTGGGAACATTTGCCTGTGAGTATTAGTCT 6373  
NbAG01-1L CACCACGACAGAAATGCAGTTGATCGGAGTGGGAACATTTGCCTGTGAGTATTAGTCT 6189  
\*\*\*\*\*

NbAG01-1H CTGCATCTCAGCGATTCTATCTAGCTTAGCTGCAATGGATTCTFAAACCTTTTATA 6433  
NbAG01-1L CTGCATCTCAGCGATTCTATCTAGCTTAGCTGCAATGGATTCTFAAACCTTTTATA 6249  
\*\* \*\*\*\*\*

NbAG01-1H ATGTAATCTTAAAGTACCGTTGTAGATTCAAAGATATGCCACCCTACTGAATTTGATT 6493  
NbAG01-1L ATGTAATCTTAAAGTACCGTTGTAGATTCAAAGATATGCCACCCTACTGAATTTGATT 6309  
\*\*\*\*\*

NbAG01-1H CTATCTCTGAGCCATGCCGCATACAGGTAATAAGATTGGTATTCTATAAACATATGAT 6553  
NbAG01-1L CTATCTCTGAGCCATGCCGCATACAGGTAATAAGATTGGTATTCTATAAACATATGAT- 6368  
\*\*\*\*\*

NbAG01-1H AGTCATGTAAGGACTCTGTGTAAGTTACTGGATTTTGTGATCTGCAGGTTACTAG 6613  
NbAG01-1L ---CATGTAAGGACTCTGTGTAAGTTACTGGATTTTAA-ACTGCAGGTTACTAG 6424  
\*\*\*\*\*

NbAG01-1H CGCCACGCTCATTATCATGTTCTGTGGATGAGAACATTTACTGTGACGCCCTGCA 6673  
NbAG01-1L CGCCACGCTCATTATCATGTTCTGTGGATGAGAACATTTACTGTGACGCCCTGCA 6484  
\*\* \*\*\*\*\*

NbAG01-1H GTCTTTGACTAACATCTTGTCTATACGTAAGTTACTTTGATCTACCGTAGTCTTTGA 6733  
NbAG01-1L GTCTTTGACTAACATCTTGTCTATACGTAAGTTACTTTGATCTACCGTAGTCTTTGA 6544  
\*\*\*\*\*

NbAG01-1H AATTTCCAGCATTCTAATCTAGTGGCTTAATGTTACTTGTAAATTCAGATAGCTA 6793  
NbAG01-1L AATTTCCAGCATTCTAATCTAGTGGCTTAATGTTACTTGTAAATTCAGATAGCTA 6604  
\*\*\*\*\*

NbAG01-1H GGTGACTCGTTCTGCTCCATTGTAATGTTACTGCATTTGTTATGGCTTTA-CTTCA 6852  
NbAG01-1L GGTGACTCGTTCTGCTCCATTGTAATGTTACTGCATTTGTTATGGCTTTTCTTCA 6664  
\*\*\*\*\*

NbAG01-1H GCATCTATTTTATTTTC--GTCCCAACCCCTCCCCCTTATCCTTTTTTGTGTTGG 6909  
NbAG01-1L GCATCTATTTTATTTTCATGTCGCAACCCCTCCCCCT-ATCCTTTTTTGTGTTGG 6723  
\*\*\*\*\*

NbAG01-1H AATTTCTCCGCTATAGTCTGTTTATCGTAGCTTACTAAGTTCATTGATGCT 6969  
NbAG01-1L AATTTCTCCGCTATAGCTGTTTATCGTAGCTTACTAAGTTCATTGATGCT 6782  
\*\*\*\*\*

NbAG01-1H GTTTCAGTTCACCAGCATATTATGCACATTTGGCAGCTTCCGTTGCTCGGTTTACAT 7029  
NbAG01-1L GTTTCAGTTCACCAGCATATTATGCACATTTGGCAGCTTCCGTTGCTCGGTTTACAT 6842  
\*\*\*\*\*

NbAG01-1H GGAGCCAGAGACATCTGATAATGGATCAGTCACAAGCGCAGCTGCTCAAACAGAGGAG 7089  
NbAG01-1L GGAGCCAGAGACATCTGACAGTGGATCAGTCACAAGCGCAGCTGCTCAAACAGAGGAG 6902  
\*\* \*\*\*\*\*

NbAG01-1H TTTAGAGCTATGGGAAGGACCGGAGCACCAGGTGCTGCTGCTGTAAGGCCCT 7149  
NbAG01-1L TTTAGAGCTATGGGAAGGACCGGAGCACCAGGTGCTGCTGCTGTAAGGCCCT 6962  
\* \*\*\*\*\*

NbAG01-1H TCCTGCTCAAGGAGAAATGTTAAGAGGTTATGTTTATTGTTAG 7195  
NbAG01-1L TCCTGCTCAAGGAGAAATGTTAAGAGGTTATGTTTATTGTTAG 7008  
\*\*\*\*\*



644  
645  
646  
647  
648  
649  
650  
651  
652  
653  
654  
655  
656  
657  
658  
659  
660  
661  
662  
663  
664  
665  
666  
667  
668  
669  
670  
671  
672  
673  
674  
675  
676  
677  
678  
679  
680  
681  
682  
683  
684  
685  
686  
687  
688  
689  
690  
691  
692  
693  
694  
695  
696  
697  
698  
699  
700  
701  
702  
703  
704  
705  
706  
707  
708  
709  
710  
711  
712  
713  
714  
715  
716  
717  
718  
719  
720  
721  
722

TERMINATOR region

```
NbAGO1-1H   TGAAGTTCCTCCCTAAACCGGCTATATGATGTGGATATTGGTTGACTTGCTAGGAGTCAT 60
NbAGO1-1L   AGAAGTTC-TCGCTAAACCGGCTATATGATGTGGATATTGGTTAATTGCTACGATTCAI 59
***** *

NbAGO1-1H   GATTGCCACTAAAATGGCAAAGATGTTTTTCTTTGAAAATTCTTAACCTTTGTTTATC 120
NbAGO1-1L   GATTGCCACTAAAATGGCAA-GATGTTTTTCTTTGAAAATTCTA---TTAGTTGTC 114
***** *

NbAGO1-1H   ACATCTGGCTTGGCTTTACCTTGAGTGTGTATAGTATCCGGTTATTGTTTGAAGTATT 180
NbAGO1-1L   ACACCTTGGCTTGGCTTTACCGTGA-TATGTGTGATATCCGGCTATTGTTTGAAGTCT 173
***** *

NbAGO1-1H   GG---AAATTGGGTCATGAAATTTCAATTGTGTAAGCCGTGTCAGTTTAGTAAGTCATT 237
NbAGO1-1L   AGCACAAATTGGGTCATGAAATTTCAATTGTCAAGGCGTGTCAAGTT---AAGTGATT 229
* *****

NbAGO1-1H   GCACATGATGTTTGTGGTGTCTAGGAGTCGCAAAATGGGCGGCTGAATCGAATATAGTTC 297
NbAGO1-1L   GCACATGATGTTTGTGGT-----ATCGAACA----- 255
***** *

NbAGO1-1H   GGGTTGAAAATGGGTAATGAGAAACGGATCAATTATCTGACCCAATCCATTTTAATATG 357
NbAGO1-1L   -----

NbAGO1-1H   GATAAAAAGGGGAATTCATGAGTTTTTGTGTATGATTACTTTTGAAGAATTTTAGTC 417
NbAGO1-1L   -----

NbAGO1-1H   TAGCCTACAATTTGAGACTTTACAACATAAAAAGTTAAATTTATTGGTTATTTTAAAAAA 477
NbAGO1-1L   -----

NbAGO1-1H   AATGGATAATATAGTTCCTTATCAACATTTGATTCGTTTTTAAAAAATTTATTATCCGATC 537
NbAGO1-1L   -----

NbAGO1-1H   TATTTTTAGTGGATAATATGTGTGATTAAGTGTTTTTTTTATTATTGTTCTTGAGGAG 597
NbAGO1-1L   -----GTTGTTCTTGAGAAG 270
***** **

NbAGO1-1H   CTTGATTGCCTATTGTCGTGGTATGCC 624
NbAGO1-1L   CTTGATTGCCTATTGTCGTAGTATGCT 297
***** **
```

723  
724  
725  
726  
727  
728  
729  
730  
731  
732  
733  
734  
735  
736  
737  
738  
739

**Figure S2**

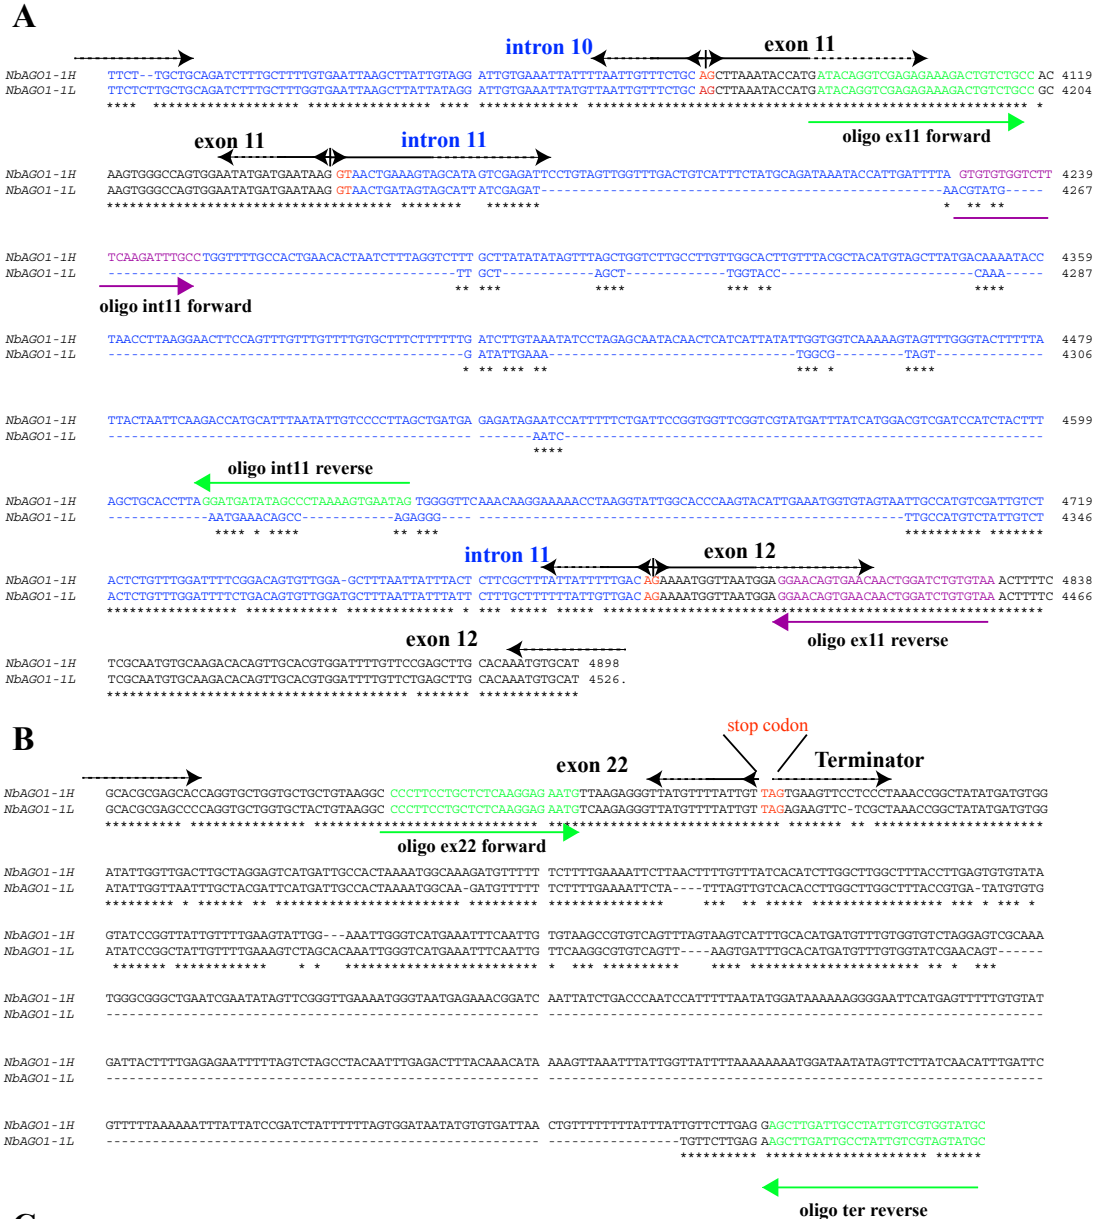

**C**

| <i>NbAGO1-1</i> locus<br>oligonucleotide<br>combination | Expected fragment size |        |
|---------------------------------------------------------|------------------------|--------|
|                                                         | H                      | L      |
| ex11 for/int 11 rev                                     | 521 bp                 | none   |
| int11 for/ex 12 rev                                     | 603 bp                 | none   |
| ex22 for/ ter rev                                       | 663 bp                 | 346 bp |

740  
741  
742  
743  
744  
745  
746

Figure S3

747 >Nbv3K765634670  
748 CACCTATCACTCTCTTTCTCTCTCTACAAACATATAGTGCCGTTTCTCTCTCGGCCTCTC  
749 TTCGTGTTTTAGGGCACCGTGGTGGTGGTATCCAGGCGGCGGTTTTGAGTTATTACcAt  
750 gGTGCGGAAGAAGAGGACTGATGTTCCCTGGTGGTGTGCTGAGAGTTTTGAGTCCCATGAAAC  
751 TGGAGGGGCACGAGGTGGTGCCTCAACGCCATCACAGCAGCAGCAACATCAGCATCAGCA  
752 AGGCGGAGGAAGAGCTGGGCACCTCAGCATGGAGGACATGGTGGCCGTGGTGGTGGGGG  
753 AGCTCCACGTGGTGAATGGCCCTCAACAATCCTATGGTGGACCTCCTGAATACTACCA  
754 ACAGGGCAGGGAACTCAACAGTATCAACGAGGTGGAGGACAACCCAGCGCCGTGGTGG  
755 CATGGGGGGCCGTGGGGCACGGCCACCAGTACCCGAGCTGCACCAAGCAACCCAGACTCC  
756 ACATCAGCCTGTACCATATGGAAGACCATCAGAAACATACTCAGAGGCTGGTTCCCTCGTC  
757 TCAGCCACCTGAACCAACGACACAGCAAGTGAAGTACTCAGCAATTCCAGCAACTTGTGTGCA  
758 GCCAGAAGCAGCTGCAACCCAAGCAATACAACCAGCATCGAGCAAGTGCATGAGGTTTTCC  
759 ACTCCGGCCAGGAAAGGGTAGTACTGGTATTAGATGCATAGTTAAGGCCAATCACTTCTT  
760 TGCCGAGTTACTTGACAAAGATCTGCACCAGTATGATGTTTTCAATTACTCCTGAGGTGCGC  
761 CTCTGGGGTGTCAACCGGGCTGTCAATGGAGCAGCTGGTGAAGCTTTATAGAGAATCCCA  
762 TCTTGGGAAGAGCTTCCAGCCTATGACGGAAGAAAAGTCTATACACAGCAGGGGCCCT  
763 CCCTTTTGTCAAAGGATTTTAAATCACTCTAATTGATGATGATGATGGACCTGGTGG  
764 TGCTAGGAGGAAAAGAGAGTTTTAAAGTTGTGATCAAGCTGGCGGCTCGTGCTGATCTTCA  
765 TCACTTGGGGATGTTCTTACAAGGGAGACAGGCTGATGCACCGCAAGAAGCACTTCAGGT  
766 GCTGGATAATGTGCTACGTGAGTTGCCAACATCTAGGTATTGTCTGTGGGCCGCTCTTT  
767 CTATTCCTCATTTAGGACGAAGCAACCACTGGGTGAAGGTTTAGAGAGCTGGCGTGG  
768 CTTCTATCAAAGTATTCGTCTTACACAGATGGGATTATCCCTGAATATTGATATGTCTTC  
769 CACGGCTTTCATTGAGCCACTGCCGATTTATTGACTTCGTGAGCCAGCTTCTGAATCGGGA  
770 TATCTCTTCTAGACCCTGTCTGATGCTGACCGCGTTAAGATAAAGAAGGCACCTGAGAGG  
771 TGTAAAGGTGGAGGCTCACTCATCGTGGAAAATATGCGGAGGAAGTATCGCATTCTCGCTT  
772 GACGTCTCAAGCAACAAGAGAGTTGACTTTTTCTGTGATGAAAAGGGGTACGATGAAAGC  
773 TGTTGTGGAAATTTTTCGGGAAACCTATGGTTTTGTGATTTCGGCATAACCCAGTTGCCTTG  
774 TCTTCAAGTTGGAAATACGCAGAGGGCCAAATTACTTGCCAATGGAAGTATGTAAGATTGT  
775 AGAGGGCAGAGATACTCAAAGCGTTGAATGAGAGGCAGATAACAGCACTTCTAAAAGT  
776 GACCTGCCAACGTCTCAAGAGAGAGAAGCAAGTATTTCTTCAAGTGTTCATCACAATGC  
777 TTATGCTGATGACCCATATGCGAAGGAGTTTGGTATTAAGATCAGTGAGAAGCTTGCTCA  
778 AGTTGAGGCTCGCGTTTTGCCTGCACCTTGGCTTAAATACCATGATACAGGTCGAGAGAA  
779 AACAGTGAACAACAGTGGATCTGTGTAACTTTTTCTCGCAATGTGCAAGACACAGTTGCACG  
780 TGGATTTTTGTTCCGAGCTTGACAAATGTGCATGATATCCGGAAATGAACTTCAATCCCAA  
781 TCCTGTTCTACCACAGTGTGCTCGCCCTGATCAAGTTGAGAGAGTCTTGAAAACCTCG  
782 ATTTACGATGCTATGACAAAGTTGACGCCAAATGGGAGAGAGCTAGATCTTTTGATTGT  
783 GATATTACCAGCAATAACGGCTCTTTATGGTGTATCTAAAACGGATTTGTGAAACTGA  
784 ACTTGGAAATGTCTCACAATGCTGCTTTGACAAAACATGTATTAAAGATGAGCAAGCAGTA  
785 TTTAGCTAATGTATCCCTGAAGATAAATGTGAAGGTTGGAGGAAGAAATACTGTGCTGGT  
786 TGATGCGCTCTTAGACGAATTCCTTGTGAGCGACCGCCCACTATCATTTTTGGTGC  
787 AGATGTCACCCATCCCCACCTGGGGAGGATTCTAGCCCGTCAATTGCTGCGGTGGTTGC  
788 TTCTCAAGATTGGCCTGAAATACAAGTATGCTGGTTTTGGTTTTGCTCAAGCGCATAG  
789 GCAAGAGCTTATACAAGATCTGTACAAAGACTTGGCAAGATCCAGTTAGAGGACCTGTGAC  
790 TGGTGGCATGATAAAGGAATTACTTATTTCTTCCGTGAGCAACTGGACAGAAGCCGCA  
791 GAGAATTATATTCTACAGAGATGGTGTAGTGAAGGACAATTTTACCAAGTTCTTCTTTT  
792 TGAATTTGATGCAATCCGCAAGGCATGTGCATCTTTAGAACCAACTATCAGCCCCCGGT  
793 TAGTTTTGTTGGTCCAGAAACGGCATCATACTAGGTTGTTTGCCAATAAACCACCAGCA  
794 CAGAAATGCAGTTGATCGGAGTGGGAACATTTTGCCTGGTACCGTTGTAGATTCAAAGAT  
795 ATGCCACCCTACTGAATTTGATTTCTATCTCTGTAGCCATGCCGCATACAGGGTACTAG  
796 CCGCCAGCTCATTATCATGTTCTGTGGGATGAGAACAATTTTACTGCTGACGCCCTGCA  
797 CTCTTTGACTAACAACTTTTGCTATACATATGCTAGGTGTACTCGTTCTGTCTCCATTGT  
798 TCCACCAGCATATTATGCACATTTGCAGCTTTCCGTGCTCGGTTTTACATGGA

800  
801 >Nbv3K605752598  
802 CTCTATTGCTTTTTGTTATCTACACATTTGATTTTTCTCTCTCTACAAATCACGGTCACC  
803 TATCACTCTCTTTCTCTCTCTACAAACATATAGTGCCGTTTCTCTCTCGGCCTCTCTTCG  
804 TGTTTTAGGGCACCGTGGTGGTGGTATCCAGGCGGCGGTTTTGAGTTATTACcAtgGTG  
805 CGGAAGAAGAGGACTGATGTTCCCTGGTGGTGTGCTGAGAGTTTTGAGTCCCATGAAACTGGA  
806 GGGGCACGAGGTGGTGCCTCAACGCCATCACAGCAGCAGCAACATCAGCATCAGCAAGGC  
807 GGAGGAAGAGGCTGGGCACCTCAGCATGGAGGACATGGTGGCCGTGGTGGTGGGGGAGCT  
808 CCACGTGGTGAATGGCCCTCAACAGTCTATGGTGGACCTTCTGAATACTACCAACAG  
809 GGCAGGGGAACCCAGCAGTATCAACGAGGTGGAGGACAACCCAGCGCCGTGGTGGCATG  
810 GGTGGCCATGGGGCACCTTCTGGTGGCCCTCCTCGGCCACCAGTACCCGAGCTGCACCAA  
811 GCAACCCAGCTCAACATCAGCCTGTACCATATGGAAGACCATCAGAAACATACTCGGAG  
812 GCTGGTTCTCTGCTCAGCCACCCGACCAACGACACAGCAAGTGAAGTACTCAGCAATTCAG  
813 CACTTGTGTGTCAGCCAGAAGCAGCTGCAACCCAAGCAATACAACCAGCATCGAGCAAG  
814 TCGATGAGTTTTCCACTCCGGCCAGGAAAGGGTAGTACTGGTATTAGATGCATAGTTAAG  
815 GCCAATCACTTCTTTGCCGAGTTACCTGACAAAGATCTGCACCAGTATGATGTTTTCAATT  
816 ACTCCTGAGGTGCGCTCTCGGGGTGTCAACCGGGCTGTCAATGGAGCAGCTGGTGAAGCTT

818 TATAGAGAATCCCATCTTGGGAAGAGGCTTCCAGCCTATGACGGAAGAAAAAGTCTATAC  
 819 ACAGCAGGGCCCCCTCCCTTTTGTTCAAAAGGATTTTAAAATCACTCTAATTGATGATGAT  
 820 GATGGACCTGGTGGTGCTAGGAGGGAAAAGAGAGTTTAAAGTTGTGATCAAGCTGGCGGCT  
 821 CGTGCTGATCTTCATCACTTGGGGATGTTCTTACAAGGGAGACAGGCTGATGCACCCGCAA  
 822 GAAGCACTTCAGGTGCTGGATATTGTGCTACGTGAGTTGCCAACATCTAGGTATTGTCTCT  
 823 GTGGGCCGCTCTTTCTATTCCCCTCATTTAGGACGAAGACAACCACTGGGTGAAGGTTTA  
 824 GAGAGCTGGCGTGGCTTCTATCAAAGTATTTCGTCTACACAGATGGGATTATCCCTGAAT  
 825 ATTGATATGTCTTCCACGGCTTTCATTGAGCCACTGCCGATTATTGACTTCGTGAGCCAG  
 826 CTTCTGAATCGGGATATCTCTTCTAGACCACTGTCTGATGCTGACCCGCTTAAGATAAAG  
 827 AAGGCACTGAGAGGTGTAAGGTGGAGGTCATCATCGTGAAAATATGCGGAGGAAGTAT  
 828 CGCATTTCTGGCTTGACGTCTCAAGCAACAAGAGAGTTGACTTTTCTGTGATGAAAAGG  
 829 GGTACGATGAAAAGCTGTTGTGGAATATTTTTCGGGAAACCTATGGTTTTGTCAATTCGGCAT  
 830 ACCCAGTTGCCTTGTCTTCAAGTTGAAAATACGCAGAGGCCAAATTAATTGCCAATGGAA  
 831 GTATGTAAGATTGTAGAGGGACAGAGATACTCAAAGCGCTTGAATGAGAGGCAGATAACA  
 832 GCACCTCTAAAAGTGACCTGCCAACGTCTCAAGAGAGAGAACGTGATATTCTTCAGACT  
 833 GTTCATCAATAGCTTATGTCTGATGACCCATATGCGAAGGAGTTTGGTATTAAGATCAGT  
 834 GAGAAGCTTGCTCAAGTTGAGGCTCGCGTTTTGCCTGCACCTTGGCTTAAATACCATGAT  
 835 ACAGGTCGAGAGAAAGACTGTCTGCCACAAGTGGGCCAGTGGAAATATGATGAATAAGAAA  
 836 ATGGTTAATGGAGGAACAGTGAACAACCTGGATCTGTGTAAACTTTTCTCGCAATGTGCAA  
 837 GACACAGTTGCAGTGGATTTTGTTCGAGCTTGACAAAATGTGCATGATATCCGGAATG  
 838 AACTTCAATCCCAATCCTGTTCTACCACCAGTGAGTGCTCGCCCTGATCAAGTTGAGAGA  
 839 GTCTTGAAAACCTCGATTTTACGATGCTATGACAAAAGTTGCAGCCAAATGGGAGAGAGCTA  
 840 GATCTTTTGTGATGATATTACCAGACAATAACGGCTCTCTTTATGGTGATCTAAAACGG  
 841 ATTTGTGAAACTGAACTTGGAAATTTGTCTCAATGTGCTTGACAAAACATGTATTTAAG  
 842 ATTAGCAAGCAGTATTTAGCTAATGTATCCCTGAAGATAAATGTGAAGTTGGAGGAAGA  
 843 AATACTGTGCTGGTTGATGCGCTCTCTAGACGAATTTCCCCTTGTGTCAGCGACCGCCCACT  
 844 ATCATTTTTGGTGCAGATGTCACCCATCCCCACCCTGGGGAGGATTCTAGCCCGTCAATT  
 845 GCTGCGGTGGTTGCTTCTCAAGATTGGCCTGAAATTACAAAGTATGCTGGTTTTGGTTTTCT  
 846 GCTCAAGCGATAGGCAAGAGCTTATACAAGATCTGTACAAGACTTGGCAAGATCCGCTT  
 847 AGAGGACCTGTGACTGGTGGCATGATAAAGGAATTACTTATTTCTTCCGTGAGCAACT  
 848 GGACAGAAGCCGAGAGAATTATATTTCTACAGAGATGGTGTAGTGAAGGACAATTTTAC  
 849 CAAGTTCTCTTTTTGAACTTGATGCAATCCGCAAGGCATGTGCATCTTTAGAACCCCACT  
 850 TATCAGCCCCCGTTACGTTTGTGTGGTCCAGAAAACGGCATCATACTAGGTTGTTTTGCC  
 851 AATAACCCACAGCAGAAAATGCAGTTGATCGGAGTGGGAACATTTTGCCTGGTACCGTT  
 852 GTAGATTCAAAAGATATGCCACCCCTACTGAATTTGATTTCTATCTCTGTAGCCATGCCGGC  
 853 ATACAGGGTACTAGCCGCCAGCTCATTTATCATGTTCTGTGGGATGAGAACAAATTTTACT  
 854 GCTGACGCCCTGCAGTCTTTGACTAACAATCTTTGCTATACATATGCTAGGTGTACTCGT  
 855 TCTGTCTCCATTGTTCCACCAGCATATATGCACATTTGGCAGCTTTCCGTGCTCGGTTT  
 856 TACATGGA  
 857  
 858 **>Nbv3K805664652**  
 859 CTCAGCATGGAGGACATGGTGGCCGTGGTGGTGGGGGAGCTCCACGTGGTGAATGGCCC  
 860 CTCAACAGTCTATGGTGGACCTTCTGAATACTACCAACAGGGCAGGGGAACCCAGCAGT  
 861 ATCAACGAGGTGGAGGACAACCCACGCGCTGGTGGCATGGGTGGCCATGGGGCACCTT  
 862 CTGGTGGCCCTCCTCGGCCACCAGTACCCGAGCTGCACCAAGCAACCCAGACTCAACATC  
 863 AGCCTGTACCATATGGAAGACCATCAGAAAACATACTCGGAGGCTGGTTCTCTGCTCAGC  
 864 CACCCGAACCAACGACACAGCAAGTGACTCAGCAATTCAGCAACTTGTGTGTCAGCCAG  
 865 AAGCAGTGCACCAACCAAGCAATAACACAGCATCGAGCAAGTCGATGAGGTTTTCCACTCC  
 866 GGCCAGGAAAGGGTAGTACTGGTATTAGATGCATAGTTAAGGCCAATCACTTCTTTGCCG  
 867 AGTTACCTGACAAAGATCTGCACCAGTATGATGTTTTCAATTACTCTGAGGTGCGCTCTC  
 868 GGGGTGTCAACCGGGCTGTATGGAGCAGCTGGTGAAGCTTTATAGAGAATCCCATCTTG  
 869 GGAAGAGGCTTCCAGCCTATGACGGAAGAAAAAGTCTATACACTGCAG  
 870  
 871 **>Nbv3K705828682**  
 872 ACATTTTATTTCTCTCTCTACAAATCACACTCACCTATCACTCTCTTTCTCTCTCTACA  
 873 AGCATATAGTGGCGTTTCTCTCTCTCCGCTCTCTTCTGTGTTTTAGGGCACCGTGGTGGT  
 874 TGGTATCCTGGCGGCGGTTTTGAGTTATTACCatgGTGCGAAGAAGAGAAGTATGTTT  
 875 CTGGTGGTGTGCTGAGAGTTTTGAGTCCCATGAAACTGGATGGGGACGAGGTGGTGTCAAC  
 876 GGCCATCACAGCAGCAGCAACATCAGCATCAGCAAGGTGGAGGAAGAGGCTGGGCACCTC  
 877 AGCATGGAGGACATGGTGGCCGTGGTGGTGGGGGAGCTCCACGTGGTGAATGGCCCCCTC  
 878 AACAGTCTATGGTGGACCTTCTGAATACTACCAACAGGGCAGGGGAACCCAGCAGTATC  
 879 AACGAGTGGAGGACAACCCAGCCTGGTGGTGGCATGGGTGGCCATGGGGCACCTTCTG  
 880 GTGGCCCTCTCTCGGCCACCAGTACCCGAGCTGCACCAAGCAACCCAGACTCAACATCAGC  
 881 CTGTACCATATGGAAGACCATCAGAAACATACTCGGAGGCTGGTTCCCTCGTCTCAGCCAC  
 882 CCGAACCAACGACACAGCAAGTGACTCAGCAATTCAGCAACTTGTGTGTCAGCCAGAAG  
 883 CAGCTGCAACCCAAAGCAATAACAACAGCATCGAGCAAGTCGATGAGGTTTCCACTCCGGC  
 884 CAGGAAAGGTTAGTACTGGTATTAGATGCATAGTTAAGGCCAATCACTTCTTTGCCGAGT  
 885 TACCTGACAAAAGATCTGCACCAGTATGATGTTTTCAATTACTCTGAGGTGCGCTCTCGGG  
 886 GTGTCAACCGGGCTGTATGGAGCAGCTGGTGAAGCTTTATAGAGAATCCCATCTTGGGA  
 887 AGAGGCTTCCAGCCTATGACGGAAGAAAAAGTCTATACACAGCAGGGCCCCCTCCCTTTTG  
 888 TTCAAAGGATTTTAAAATCACTCTAATTGATGATGATGATGGACCTGGTGGTGTAGGA

889 GGGAAAGAGAGTTTAAAGTTGTGATCAAGCTGGCGGCTCGTGCTGATCTTCATCACTTGG  
890 GGATGTTCTTACAAGGGGAGACAGGCTGATGCACCGCAAGAAGCACTTCAGGTGCTGGATA  
891 TTGTGCTACGTGAGTTGCCAACATCTAGGTATTGTCTGTGGCCGCTCTTTCTATTCCC  
892 CTCATTTAGGACGAAGACAACCCTGGGTGAAGGTTTAGAGAGCTGGCGTGGCTTCTATC  
893 AAAGTATTCGTCTACACAGATGGGATTATCCCTGAATATTGATATGTCTCCACGGCTT  
894 TCATTGAGCCACTGCCGATTATTGACTTCGTGAGCCAGCTTCTGAATCGGGATATCTCTT  
895 CTAGACCCTGTCTGATGCTGACCGGCTTAAGATAAAGAAGGCACTGAGAGGTGTAAAGG  
896 TGGAGGTCACTCATCGTGGAAATATGCGGAGGAAGTATCGCATTTCTGGCTTGACGTCTC  
897 AAGCAACAAGAGAGTTGACTTTTCTGTGATGAAAGGGGTACGATGAAAGCTGTTGTGG  
898 AATATTTTCGGGAAACCTATGGTTTTGTCAATTCGGCATAACCCAGTTGCCTTGTCTTCAAG  
899 TTGGAATAACGCAGAGGCCAAATTACTTGCCAATGGAAGTATGTAAGATTGTAGAGGGAC  
900 AGAGATACTCAAAGCGCTTGAATGAGAGGCAGATAACAGCACTTCTAAAAGTGACCTGCC  
901 AACGTCTCAAGAGAGAGAACGTGATATTCTTCAGACTGTTCAACAATGCTTATGCTG  
902 ATGACCCATATGCGAAGGAGTTTGGTATTAAGATCAGTGAGAAGCTTGCTCAAGTTGAGG  
903 CTCGCGTTTTGCTGCACCTTGGCTTAAATACCATGATACAGGTCGAGAGAAAAGACTGTC  
904 TGCCCAAGTGGGCCAGTGGAAATGATGAATAAGAAAATGGTTAATGGAGGAACAGTGA  
905 ACAACTGGATCTGTGTAACCTTTTCTCGCAATGTGCAAGACACAGTTGCACGTGGATTTT  
906 GTTCCGAGCTTGCAAAATGTGCATGATATCCGGAATGAACTTCAATCCCAATCCTGTTT  
907 TACCACAGTGAGTGCTCGCCCTGATCAAGTTGAGAGAGTCTTGAAAACCTCGATTTACAG  
908 ATGCTATGCAAAAGTTGCAGCCAAATGGGAGAGAGCTAGATCTTTTGGATTGTGATATTAC  
909 CAGACAATAACGGCTCTCTTTATGGTGATCTAAAACGGATTTGTGAAAACCTGAACTTGGAA  
910 TTGTCTCACAATGCTGCTTGACAAAACATGTATTTAAGATGAGCAAGCAGTATTTAGCTA  
911 ATGTATCCCTGAAGATAAATGTGAAGTTGGAGGAAGAAATACTGTGCTGGTTGATGCGC  
912 TCTCTAGACGAATTTCCCTTGTGAGCGACCGCCAACTATCATTTTGGTGCAGATGTCA  
913 CCCATCCCCACCCTGGGGAGGATTTAGCCCGTCAATTGCTGCGGTGGTTGCTTCTCAAG  
914 ATTGGCCTGAAAATTACAAAGTATGCTGGTTTTGGTTTTCTGCTCAAGCGCATAGGCAAGAGC  
915 TTATACAAGATCTGTACAAGACTTGGCAAGATCCAGTTAGAGGACCTGTGACTGGTGGCA  
916 TGATAAAGGAATTACTTATTTCTTCCGTGAGCAACTGGACAGAAGCCGAGAGAATTA  
917 TATTCACAGAGATGGTGTAGTGAAGGACAATTTTACCAAGTTCTTTTGAACCTT  
918 ATGCAATCCGCAAGGCATGTGCATCTTTAGAACCCTATCAGCCCCGGTTACGTTTTG  
919 TTGTGGTCCAGAAAACGGCATCATACTAGGTTGTTTTGCCAATAACCACCAGCAGAAATG  
920 CAGTTGATCGGAGTGGGAACATTTTGCCTGGTACCGTTGTAGATTCAAAGATATGCCACC  
921 CTACTGAAATTTGATTTCTATCTCTGTAGCCATGCCGGCATAACAGGGTACTAGCCGCCAG  
922 CTATTATCATGTTCTGTGGGATGAGAACAATTTTACTGTGTCAGCCCTGCAGCTTTTGA  
923 CTAACAATCTTTGCTATACATATGCTAGGTGTAAGTCTGTTCTGCTCCATTGTTCCACCAG  
924 CATATTATGCACATTTGGCAGCTTTCCGTGCTCGGTTTTACATGGAGCCAGAGACATCTG  
925 ATAATGGATCAGTACAAGCGCAGCTGCTTCAAACAGAGGAGGTTTAGGAGCTATGGGAA  
926 GGAGCACGCGAGACCAGGTGCTGGTGTGCTGCTGTAAGGCCCTTCTGCTCTCAAGGAGA  
927 ATGTTAAGAGGGTTATGTTTTATTGTTAGTGAAGTTCTCCCTAAAACCGGCTATATGATG  
928 TGGATATTGGTTGACTTGCTAGGAGTCATGATTGCCACTAAAATGGCAAAGATGTTTTTT  
929 CTTTTGAAAATTTCTTAACTTTTTGTTTTATCACATCTTGGCTTGGCTTTACCTTGAGTGTGT  
930 ATAGTATCCGGTTATTGTTTTGAAGTATTGGAAATTTGGGTCAAGAAATTTCAATTTGTGTA  
931 AGCCGTGTCAGTTTAGTAAGTCAATTTGCACATGATGTTTTGTGGTGTCTAGGAGTCGAAA  
932 TGGCGGGCTGAATCGAATATAGTTTCGGGTTGAAAATGGGTAATGAGAAAACG

**>Nbv3K705826800**

935 ACATTTTTATTTCTCTCTCTACAAATCACACTCACCTATCACTCTCTTTCTCTCTCTACA  
936 AGCATATAGTGCCGTTTTCTCTCTCTCCGCTCTCTTCGTGTTTTAGGGCACCGTGGTGGT  
937 TGGTATCCTGGCGGCGTTTTGAGTTATTACatgGTGCGAAGAAGAGAAGACTGATGTTCT  
938 CTGGTGGTGTGCTGAGAGTTTTGAGTCCCATGAAAACCTGGATGGGGACGAGGTGGTGTCTCA  
939 GGCCATCACAGCAGCAGCAACATCAGCATCAGCAAGGTGGAGGAAGAGGCTGGGCACCTC  
940 AGCATGGAGGACATGGTGGCCGTGGTGGGGGAGCTCCACGTGGTGGAAATGGCCCTC  
941 AACAGTCCATATGGTGGACCTTCTGAATACTACCAACAGGGCAGGGGAACCCAGCAGTATC  
942 AACGAGGTGGAGGACAACCCAGCGCCGTGGTGGCATGGGTGGCCATGGGGCACCTTCTG  
943 GTGGCCCTCTCTCGGCCACCAGTACCCGAGCTGCACCAAGCAACCCAGACTCAACATCAGC  
944 CTGTACCATATGGAAGACCATCAGAAACATACTCGGAGGCTGGTTCCCTCGTCTCAGCCAC  
945 CCGAACCAACGACACAGCAAGTGACTCAGCAATTCAGCAACTTGTGTTGTCAGCCAGAAG  
946 CAGCTGCAACCCAAGCAATACAACCAGCATCGAGCAAGTCGATGAGGTTTCCACTCCGGC  
947 CAGGAAAGGGTAGTACTGGTATTAGATGCATAGTTAAGGCCAATCACTTCTTTGCCGAGT  
948 TACCTGACAAAAGATCTGCACCAGTATGATGTTTTCAATTACTCCTGAGGTGCGCTCTCGGG  
949 GTGTCAACCGGGCTGTCTATGGAGCCTGGTGAAGCTTTATAGAGAATCCCATCTTGGGA  
950 AGAGGCTTCCAGCCTATGACGGAAGAAAAAGTCTATACACAGCAGGGCCCTCCCTTTTTG  
951 TTCAAAGGATTTTAAATCACTCTAATTGATGATGATGATGGACCTGGTGGTGTCTAGGA  
952 GGGAAAGAGAGTTTAAAGTTGTGATCAAGCTGGCGGCTCGTGCTGATCTTCATCACTTGG  
953 GGATGTTCTTACAAGGGAGACAGGCTGATGCACCGCAAGAAGCACTTCAGGTGCTGGATA  
954 TTGTGTTACTTGCACACATCTAGGTATTGTCTGTGGCCGCTCTTTCTATTCCC  
955 CTCATTTAGGACGAAGACAACCCTGGGTGAAGGTTTAGAGAGCTGGCGTGGCTTCTATC  
956 AAAGTATTCGTCTACACAGATGGGATTATCCCTGAATATTGATATGTCTCCACGGCTT  
957 TCATTGAGCCACTGCCGATTATTGACTTCGTGAGCCAGCTTCTGAATCGGGATATCTCTT  
958 CTAGACCCTGTCTGATGCTGACCGGCTTAAGATAAAGAAGGCACTGAGAGGTGTAAAGG  
959

960 TGGAGGTCACCTCATCGTGAAATATGCGGAGGAAGTATCGCATTCTGGCTTGACGTCTC  
 961 AAGCAACAAGAGAGTTGACTTTTCTCGTTCGATGAAAGGGGTACGATGAAAGCTGTTGTGG  
 962 AATATTTTCGGGAAACCTATGGTTTTGTCTATTCCGCATACCCAGTTGCCTTGTCTTCAAG  
 963 TTGGAAATACGCAGAGGCCAAATTACTTGCCAATGGAAGTATGTAAGATTGTAGAGGGAC  
 964 AGAGATACTCAAAGCGCTTGAATGAGAGGCAGATAACAGCACTTCTAAAAGTGACCTGCC  
 965 AACGTCCTCAAGAGAGAGAACGTGATATTCTTCAGACTGTTTCATCACAATGCTTATGCTG  
 966 ATGACCCATATGCGAAGGAGTTTGGTATTAAGATCAGTGAGAAGCTTGCTCAAGTTGAGG  
 967 CTCGCGTTTTGCTGCACCTTGGCTTAAATACCATGATACAGGTCGAGAGAAAGACTGTC  
 968 TGCCACAAGTGGGCCAGTGGAAATATGATGAATAAGAAAATGGTAAATGGAGGAACAGTGA  
 969 ACAACTGGATCTGTGTAACCTTTTCTCGCAATGTGCAAGACACAGTTGCACGTGGATTTT  
 970 GTTCCGAGCTTGCACAAAATGTGCATGATATCCGGAATGAACTTCAATCCCAATCCTGTTC  
 971 TACCACCAGTGAGTGCTCGCCCTGATCAAGTTGAGAGAGTCTTGAAAACCTCGATTTCCAG  
 972 ATGCTATGACAAAGTTGCAGCCAAATGGGAGAGAGCTAGATCTTTTGATTGTGATATTAC  
 973 CAGACAATAACGGCTCTCTTTATGGTGATCTAAAACGGATTTGTGAAAACCTGAACTTGGAA  
 974 TTGCTCACAATGCTGCTTGACAAAACATGTATTTAAGATGAGCAAGCAGTATTTAGCTA  
 975 ATGTATCCCTGAAGATAAATGTGAAGCTTGGAGGAAGAAAATACCTGTGCTGGTTGATGCGC  
 976 TCTCTAGACGAATTTCCCTTGTGACGACCGCCCAACTATCATTTTTGGTGCAGATGTCA  
 977 CCCATCCCCACCCTGGGGAGGATTTAGCCCCGTCAATTGCTGCGGTGGTTGCTTCTCAAG  
 978 ATTGGCCTGAAAATTACAAAGTATGCTGGTTTTGGTTTTCTGCTCAAGCGCATAGGCAAGAGC  
 979 TTATACAAGATCTGTACAAGACTTGGCAAGATCCAGTTAGAGGACCTGTGACTGGTGGCA  
 980 TGATAAAGGAATTACTTATTTCTTCCGTCGAGCAACTGGACAGAAGCCGAGAGAATTA  
 981 TATTCTACAGAGATGGTGTAGTGAAGACAATTTTACCAAGTCTTCTTTTTGAACTTG  
 982 ATGCAATCCGCAAGGCATGTGCATCTTTAGAACCCTATCAGCCCCCGGTTACGTTTTG  
 983 TTGTGGTCCAGAAAACGGCATCATACTAGGTTGTTTTGCCAATAACCACCAGACAGAAATG  
 984 CAGTTGATCGGAGTGGGAACATTTTTGCTGGTACCGTTGTAGATTCAAAGATATGCCACC  
 985 CTACTGAATTTGATTTCTATCTCTGTAGCCATGCCGGCATAACAGGGTACTAGCCGCCAG  
 986 CTCATTATCATGTTCTGTGGGATGAGAAACAATTTTACTGCTGACGCCCTGCAGTCTTTGA  
 987 CTAACAATCTTTGCTATACATATGCTAGGTGTAAGTCTGTTCTGCTCCATTGTTCCACCAG  
 988 CATATTATGCATTTGGCAGCTTTGCTGCTCGGTTTTACATGGAACAGAGACATCTG  
 989 ACAGTGGATCAGTCACAAGCGCAGCTGCTTCAAACAGAGGAGGTGTAGGAGCTATGGGAA  
 990 GGAGCACGCGAGCCCCAGGTGCTGGTGCTACTGTAAGGCCCTTCTGCTCTCAAGGAGA  
 991 ATGTCAAGAGGGTTATGTTTTATTGTTAGAGAAGTTCTCGCTAAACCGGCTATATGATGT  
 992 GGTATTTGGTTAATTTGCTACGATTCATGATTGCCACTAAAATGGCAAGATGTTTTTTCT  
 993 TTTGAAAATTTCTATTTAGTTGTACACCTTGGCTTGGCTTTACCCTGATATGTGTGATAT  
 994 CCGGCTATTGTTTTGAAAGTCTAGCACAAAATGGGTGATGAAATTTCAATTGTTCAAGGC  
 995 GTGTCAGTTAAGTGATTTGCACATGATGTTTGTGGTATCGAACAG  
 996  
 997  
 998  
 999 **>Nbv3K745621734**  
 1000 ACACATTTTATTTTCTCTCTCTACAAATCACACTCACCTATCACTCTCTTTCTCTCTCTA  
 1001 CAAGCATATAGTGCCGTTTTCTCTCTCCTCCGCTCTCTTCGTGTTTTAGGGCACCGTGGTG  
 1002 GTTGGTATCTTGGCGGCGTTTTGCTGATTTATTACatgGTGCGAAGAAGAGAAGTATGATG  
 1003 TCCTGGTGGTGTGCTGAGAGTTTTGAGTCCCATGAAACTGGATGGGGACGAGGTGGTGTCTCA  
 1004 ACGGCCATCACAGCAGCAGCAACATCAGCATCAGCAAGGTGGAGGAAGAGGCTGGGCACC  
 1005 TCAGCATGGAGGACATGGTGGCCGTGGTGGTGGGGGAGCTCCACGTGGTGGAAATGGCCCC  
 1006 TCAACAGTCTTATGGTGGACCTTCTGAATACTACCAACAGGGCAGGGGAACCCAGCAGTA  
 1007 TCAACGAGTGGAGGACAAACCCGCGCTGGTGGCATGGTGGCCATGGGGCACCTTCT  
 1008 TGGTGGCCCTCTCGGCCACCAGTACCCGAGCTGCACCAAGCAACCCAGACTCAACATCA  
 1009 GCCTGTACCATATGGAAGACCATCAGAAAATACTCGGAGGCTGGTTCCTCGTCTCAGCC  
 1010 ACCCGAACCAACGACACAGCAAGTGACTCAGCAATTCAGCAACTTGTGTGTCAGCCAGA  
 1011 AGCAGCTGCAACCCAAAGCAATAACAACAGCATCGAGCAAGTCGATGAGGTTTCCACTCCG  
 1012 CCGAGGAAGGGTAGTACTGGTATTAGATGCATAGTTAAGGCCAATCACTTCTTTGGCCGA  
 1013 GTTACCTGACAAAGATCTGCACCAGTATGATGTTTTCAATTACTCTGAGGTCGCCTCTCG  
 1014 GGGTGTCAACCGGGCTGTCTATGGAGCAGCTGGTGAAGCTTTATAGAGAATCCCATCTTGG  
 1015 GAAGAGGCTTCCAGCCTATGACGGGAAGAAAAGTCTATACACAGCAGGGCCCCCTCCCTTT  
 1016 TGTTCAAAAGGATTTTAAAATCACTCTAATTGATGATGATGATGATGACCTGGTGGTCTAG  
 1017 GAGGGAAGAGAGTTTTAAAGTTGTGATCAAGCTGGCGGCTCGTGTGATCTTCACTACTT  
 1018 GGGGATGTTCTTACAAGGGAGACAGGCTGATGCACCGCAAGAAGCACTTCAAGGTGCTGGA  
 1019 TATTGTGCTACGTGAGTTGCCAACATCTAGGTATTGTCTGTGGCCGCTCTTTCTATTCT  
 1020 CCCTCATTTAGGACGAAGACAACCACTGGGTGAAGTTTTAGAGAGCTGGCGTGGCTTCTA  
 1021 TCAAAGTATTCGTCTACACAGATGGGATTATCCCTGAATATTGATATGTCTTCCACGGC  
 1022 TTTCAATTGAGCCACTGCCGATTATTGACTTTCGTGAGCCAGCTTCTGAATCGGGATATCTC  
 1023 TTCTAGACCACTGTCTGATGCTGACCGGTTAAGATAAAGAAGGCACTGAGAGGTGTA  
 1024 GGTGGAGGTCACCTCATCGTGAAATATGCGGAGGAAGTATCGCATTCTGGCTTGACGCTC  
 1025 TCAAGCAACAAGAGAGTTGACTTTTTCTGTGATGAAAGGGTACGATGAAAGCTGTTGT  
 1026 GGAATATTTTCGGGAAACCTATGGTTTTTGTCTATTCCGATACCCAGTTGCCTTGTCTTCA  
 1027 AGTTGGAAATACGCAGAGGCCAAATTACTTGCCAATGGAAGTATGTAAGATTGTAGAGGG  
 1028 ACAGAGATACTCAAAGCGCTTGAATGAGAGGCAGATAACAGCACTTCTAAAAGTGACCTG  
 1029 CCAACGTCCTCAAGAGAGAGAACGTGATATTCTTCAGACTGTTTCATCACAATGCTTATGC  
 1030 TGATGACCCATATGCGAAGGAGTTTGGTATTAAGATCAGTGAGAAGCTTGCTCAAGTTGA

1031 GGCTCGCGTTTTGCTGCACCTTGGCTTAAATACCATGATACAGGTCGAGAGAAAGACTG  
1032 TCTGCCACAAGTGGGCCAGTGGAAATATGATGAATAAGAAAAATGGTTAATGGAGGAACAGT  
1033 GAACAACCTGGATCTGTGTAAACTTTTTCTCGCAATGTGCAAGACACAGTTGCACGTGGATT  
1034 TTGTTCCGAGCTTGCACAAATGTGCATGATATCCGGAATGAACTTCAATCCCAATCCTGT  
1035 TCTACCACCAAGTGTGCTCGCCCTGATCAAGTTGAGAGAGTCTTGAAGAACTCGATTTCA  
1036 CGATGCTATGACAAAGTTGCAGCCAAATGGGAGAGAGCTAGATCTTTTGATTGTGATATT  
1037 ACCAGACAATAACGGCTCTCTTTATGGTGATCTAAAACGGATTTGTGAAACTGAACTTGG  
1038 AATTGTCTACAATGCTGCTTGACAAAACATGTATTTAAGATGAGCAAGCAGTATTTAGC  
1039 TAATGTATCCCTGAAGATAAATGTGAAGGTTGGAGGAAGAAATACTGTGCTGGTTGATGC  
1040 GCTCTCTAGACGAATTTCCCTTGTGACGACCGCCCAACTATCATTTTTGGTGCAGATGT  
1041 CACCCATCCCCACCCTGGGGAGGATTTAGCCCGTCAATTGCTGCGGTGGTTGCTTCTCA  
1042 AGATTGGCCTGAAATTACAAAGTATGCTGGTTTGGTTTCTGCTCAAGCGCATAGGCAAGA  
1043 GCTTATACAAGATCTGTACAAGACTTGGCAAGATCCAGTTAGAGGACCTGTGACTGGTGG  
1044 CATGATAAAGGAATTACTTATTTCTTCCGTGAGCAACTGGACAGAAGCCGCAGAGAAT  
1045 TATATTTACAGAGATGGTGTAGTGAAGGACAATTTTACCAAGTCTTCTTTTTTGAAC  
1046 TGATGCAATCCGCAAGGCATGTGCATCTTTAGAACCAACTATCAGCCCCGGTTACGTT  
1047 TGTTGTGGTCCAGAAACGGCATCATACTAGGTTGTTTGGCAATAACCACCACGACAGAAA  
1048 TGCAGTTGATCGGAGTGGGAACATTTTGCCTGGTACCGTTGTAGATTCAAAGATATGCCA  
1049 CCCTACTGAATTTGATTTCTATCTCTGTAGCCATGCCGGCATAACAGGGTACTAGCCGCC  
1050 AGCTCATTATCATGTTCTGTGGGATGAGAAACAATTTTACTGCTGACGCCCTGCAGTCTTT  
1051 GACTAACCAATCTTTGCTATACATATGCTAGGTGTAAGTCTGTTCTGCTCCATTGTTCCACC  
1052 AGCATATTTATGCACATTTGGCAGCTTTCCGTGCTCGGTTTTACATGGAACCAGAGACATC  
1053 TGACAGTGGATCAGTCAACAGCCAGCTGCTTCAAACAGAGGAGGTGTAGGAGCTATGGG  
1054 AAGGAGCAGCGAGCCCGAGTGTGGTGTACTGTAAGGCCCTTCTGCTCTCAAGGA  
1055 GAATGTCAAGAGGGTTATGTTTTATGTTTGTAGAGAAGTTCTCGCTAAACCGGCTATATGAT  
1056 GTGGATATTGGTTAATTTGCTACGATTCATGATTGCCACTAAAATGGCAAGATGTTTTTT  
1057 CTTTTGAAAATTTCTATTTAGTTGTACACCTTGGCTTGGCTTTACCGTGATATGTGTGAT  
1058 ATCCGGCTATTTGTTTTGAAAGTCTAGCACAAA

1059

>Nbv3K745621399

1061 ACACATTTTATTTTCTCTCTCTACAAATCACACTCACCTATCACTCTCTTTCTCTCTCTA  
1062 CAAGCATATAGTGCCGTTTTCTCTCTCCTCCGCTCTCTTCTGTTTATAGGGCACCGTGGT  
1063 TTGGTATCCTGGCGGGGTTTTGAGTTATTACCatgGTGCGAAGAAGAGAAGTGTATGT  
1064 TCCTGGTGGTGTGAGAGTTTTGAGTCCCATGAAACTGGATGGGGACGAGGTGGTGTCTCA  
1065 ACGGCCATCACAGCAGCAGCAACATCAGCATCAGCAAGGTGGAGGAAGAGGCTGGGCACC  
1066 TCAGCATGGAGGACATGGTGGCCGTGGTGGGGGAGCTCCACGTGGTGAATGGCCCC  
1067 TCAACAGTCTATGGTGGACCTTCTGAATACTACCAACAGGGCAGGGGAACCCAGCAGTA  
1068 TCAACGAGGTGGAGGACAACCCAGCCGCTGGTGGCATGGGTGGCCATGGGGCACCTC  
1069 TGGTGGCCCTCTCGGCCACCCAGCTGACCAAGCAACCCAGACTCAACATCA  
1070 GCCTGTACCATATGGAAGACCATCAGAAAATACTCGGAGGCTGGTTCTCGTCTCAGCC  
1071 ACCCGAACCACGACACAGCAAGTGACTCAGCAATTCCAGCAACTTGTGTGCAGCCAGA  
1072 AGCAGCTGCAACCAAGCAATACAACCAGCATCGAGCAAGTCGATGAGGTTTCCACTCCG  
1073 GCCAGGAAAGGGTAGTACTGGTATTAGATGCATAGTTAAGGCCAATCACTTCTTTGCCGA  
1074 GTTACCTGACAAAAGATCTGCACCAGTATGATGTTTCAATTACTCCTGAGGTGCGCTCTCG  
1075 GGGTGTCAACCGGGCTGTATGGAGCAGCTGGTGAAGCTTTATAGAGAATCCCATCTTGG  
1076 GAAGAGGCTTCCAGCCTATGACGGAAGAAAAGTCTATACACAGCAGGGCCCCCTCCCTTT  
1077 TGTTCAAAGGATTTTAAAATCACTAATTGATGATGATGATGGACCTGGTGGTGTCTAG  
1078 GAGGAAAAGAGAGTTTAAAGTTGTGATCAAGCTGGCGGCTCGTCTGATCTTCATCACTT  
1079 GGGGATGTTCTTACAAGGGAGACAGGCTGATGCACCGCAAGAAGCACTTCAGGTGCTGGA  
1080 TATTGTGCTACGTGAGTTGCCAACATCTAGGTATTGTCTGTGGCCGCTCTTTCTATTCT  
1081 CCCTCATTTAGGACGAAGACAACCACTGGGTGAAGGTTTAGAGAGCTGGCGTGGCTTCTA  
1082 TCAAAGTATTCGTCTACACAGATGGGATTATCCCTGAATATTGATATGTCTTCCACGGC  
1083 TTTTCATTGACCCTGCTCCGATTATTGACTTCTGTGAGCCAGCTTCTGAATCGGGATATCT  
1084 TTCTAGACCCTGTCTGATGCTGACCCGCTTAAAGATAAAGAAGGCACTGAGAGGTGTA  
1085 GGTGGAGTCACTCATCGTGGAAATATGCGGAGGAAGTATCGCATTTCTGGCTTGACGTC  
1086 TCAAGCAACAAGAGAGTTGACTTTTTCTGTGATGAAAGGGGTACGATGAAAGCTGTTGT  
1087 GGAATATTTTCGGGAAACCTATGGTTTTGTGATTCGGCATACCCAGTTGCCTTGTCTTCA  
1088 AGTTGGAAATACGCAGAGGCCAAATTACTTGCCAATGGAAGTATGTAAGATTGTAGAGGG  
1089 ACAGAGATACTCAAAGCGCTTGAATGAGAGGCAGATAACAGCACTTCTAAAAGTGACCTG  
1090 CCAACGCTCTCAAGAGAGAGACGTGATATTCTTCAGACTGTTATCACAATGCTTATGC  
1091 TGATGCCCATATGCGAAGGAGTTTGGTATTAAGATCAGTGAGAAGCTTGCTCAAGTTGA  
1092 GGCTCGCTTTTTGCTGCACCTTGGCTTAAATAACCATGATACAGGTCGAGAGAAAAGACTG  
1093 TCTGCCACAAGTGGGCCAGTGGAAATATGATGAATAAGAAAAATGGTTAATGGAGGAACAGT  
1094 GAACAACCTGGATCTGTGTAAACTTTTTCTCGCAATGTGCAAGACACAGTTGCACGTGGATT  
1095 TTGTTCCGAGCTTGCACAAATGTGCATGATATCCGGAATGAACTTCAATCCCAATCCTGT  
1096 TCTACCACAGTGAAGTGTGCTGCTGATCAAGTTGAGAGAGTCTTGAAGAACTCGATTTCA  
1097 TGTGCTATGACAAAAGTTGCAGCCAAATGGGAGAGAGCTAGATCTTTTGATTGTGATATT  
1098 ACCAGACAATAACGGCTCTCTTTATGGTGATCTAAAACGGATTTGTGAAACTGAACTTGG  
1099 AATTGTCTACAATGCTGCTTGACAAAACATGTATTTAAGATGAGCAAGCAGTATTTAGC  
1100 TAATGTATCCCTGAAGATAAATGTGAAGGTTGGAGGAAGAAATACTGTGCTGGTTGATGC  
1101 GCTCTCTAGACGAATTTCCCTTGTGACGACCGCCCAACTATCATTTTTGGTGCAGATGT



1102 CACCCATCCCCACCTGGGGAGGATTCTAGCCCGTCAATTGCTGCGGTGGTTGCTTCTCA  
 1103 AGATTGGCCTGAAATTACAAAGTATGCTGGTTTGGTTTCTGCTCAAGCGCATAGGCAAGA  
 1104 GCTTATAACAAGATCTGTACAAGACTTGGCAAGATCCAGTTAGAGGACCTGTGACTGGTGG  
 1105 CATGATAAAGGAATTACTTATTTCCCTCCGTCGAGCAACTGGACAGAAGCCGCAGAGAAT  
 1106 TATATTCTACAGAGATGGTGTAGTGAAGGACAATTTACCAAGTTCTTCTTTTTGAAC  
 1107 TGATGCAATCCGCAAGGCATGTGCATCTTTAGAACCAACTATCAGCCCCCGGTTACGTT  
 1108 TGTGTGGTCCAGAAACGGCATCATACTAGGTTGTTTGCCAATAACCACCACGACAGAAA  
 1109 TGCAGTTGATCGGAGTGGGAACATTTGCCTGGTACCGTTGTAGATTCAAAGATATGCCA  
 1110 CCCTACTGAATTTGATTTCTATCTCTGTAGCCATGCCGGCATAACAGGGTACTAGCCGCC  
 1111 AGCTCATTATCATGTTCTGTGGGATGAGAAACAATTTACTGCTGACGCCCTGCAGTCTTT  
 1112 GACTAACAATCTTTGCTATACATATGCTAGGTGTAAGTCTCGTTCTGTCTCCATTGTTCCACC  
 1113 AGCATATTATGCACATTTGGCAGCTTTCCGTCGCTCGGTTTTACATGGAGCCAGAGACATC  
 1114 TGATAATGATCAGTCACAAGCGCAGCTGCTTCAAACAGAGGAGGTTTAGGAGCTATGGG  
 1115 AAGGAGCACGCGAGCACACAGGTGCTGGTGCTGCTGTAAGGCCCTTCTGCTCTCAAGGA  
 1116 GAATGTTAAGAGGTTATGTTTTATGTTAGTGAAGTTCCTCCCTAAACCGGCTATATGA  
 1117 TGTGGATATTGGTTGACTTGCTAGGAGTCATGATTGCCACTAAAATGGCAAAGATGTTTT  
 1118 TTCTTTTGAAAATTCTTAACCTTTGTTTATCACATCTTGGCTTGGCTTTACCTTGAGTGT  
 1119 GTATAGTATCCGGTTATTGTTTTGAAGTATTGGAAATTGGGTATGAAATTTCAATTGTG  
 1120 TAAGCCGTGTCAGTTTAGTAAGTCAATTTGCACATGATGTTTGTGGTGTCTAGG

1121  
 1122  
 1123  
 1124  
 1125  
 1126

**Figure S4**

1128  
 1129  
 1130  
 1131  
 1132  
 1133  
 1134  
 1135  
 1136  
 1137  
 1138  
 1139  
 1140  
 1141  
 1142  
 1143  
 1144  
 1145  
 1146  
 1147  
 1148  
 1149  
 1150  
 1151  
 1152  
 1153  
 1154  
 1155  
 1156  
 1157  
 1158  
 1159  
 1160

i)  
 ntamiR168a/b/c UCGCUUGGUGCAGGUCGGGAC 21  
 ntamiR168d/e UCGCUUGGUGCAGGUCGGGAA 21  
 \*\*\*\*\*  
 ii)  
 bnamiR168 UCGCUUGGUGCAGGUCGAGAA 21  
 ntamiR168d/e UCGCUUGGUGCAGGUCGGGAA 21  
 ccamiR168a UCGCUUGGUGCAGGUCGGGAA 21  
 vunmiR168 UCGCUUGGUGCAGGUCGGGAA 21  
 mtrmiR168b/c UCGCUUGGUGCAGGUCGGGAA 21  
 tccmiR168 UCGCUUGGUGCAGGUCGGGAA 21  
 alymiR168a/b UCGCUUGGUGCAGGUCGGGAA 21  
 rcomiR168 UCGCUUGGUGCAGGUCGGGAA 21  
 crtmiR168 UCGCUUGGUGCAGGUCGGGAA 21  
 cclmiR168 UCGCUUGGUGCAGGUCGGGAA 21  
 vvimiR168 UCGCUUGGUGCAGGUCGGGAA 21  
 ptcmiR168a/b UCGCUUGGUGCAGGUCGGGAA 21  
 athmiR168a/b UCGCUUGGUGCAGGUCGGGAA 21  
 bnamiR168a UCGCUUGGUGCAGGUCGGGAA 21  
 gmamiR168a UCGCUUGGUGCAGGUCGGGAA 21  
 osamiR168a UCGCUUGGUGCAGAUCCGGGAC 21  
 sofmiR168b UCGCUUGG-GCAGAUCCGGGAC 20  
 sbimiR168 UCGCUUGGUGCAGAUCCGGGAC 21  
 sofmiR168a UCGCUUGGUGCAGAUCCGGGAC 21  
 zmamiR168a/b UCGCUUGGUGCAGAUCCGGGAC 21  
 hvumiR168 UCGCUUGGUGCAGAUCCGGGAC 21  
 bdimiR168 UCGCUUGGUGCAGAUCCGGGAC 21  
 ntamiR168a/b/c UCGCUUGGUGCAGGUCGGGAC 21  
 cmemiR168 UCGCUUGGUGCAGGUCGGGA- 20  
 gmamiR168b UCGCUUGGUGCAGGUCGGG-- 19  
 mtrmiR168a UUGCUUGGUGCUGGUCGGGAA 21  
 osamiR168b AGGCUUGGUGCAGCUCGGGAA 21  
 aqcmiR168 UGCUUAGUGCAGCUCGGGGA 21  
 \*\*\*\*\*

1161  
 1162  
 1163  
 1164  
 1165  
 1166  
 1167  
 1168  
 1169  
 1170

1171  
1172  
1173  
1174  
1175  
1176  
1177  
1178  
1179  
1180  
1181  
1182  
1183  
1184  
1185  
1186  
1187  
1188  
1189  
1190  
1191  
1192  
1193  
1194  
1195  
1196

**Figure S5**

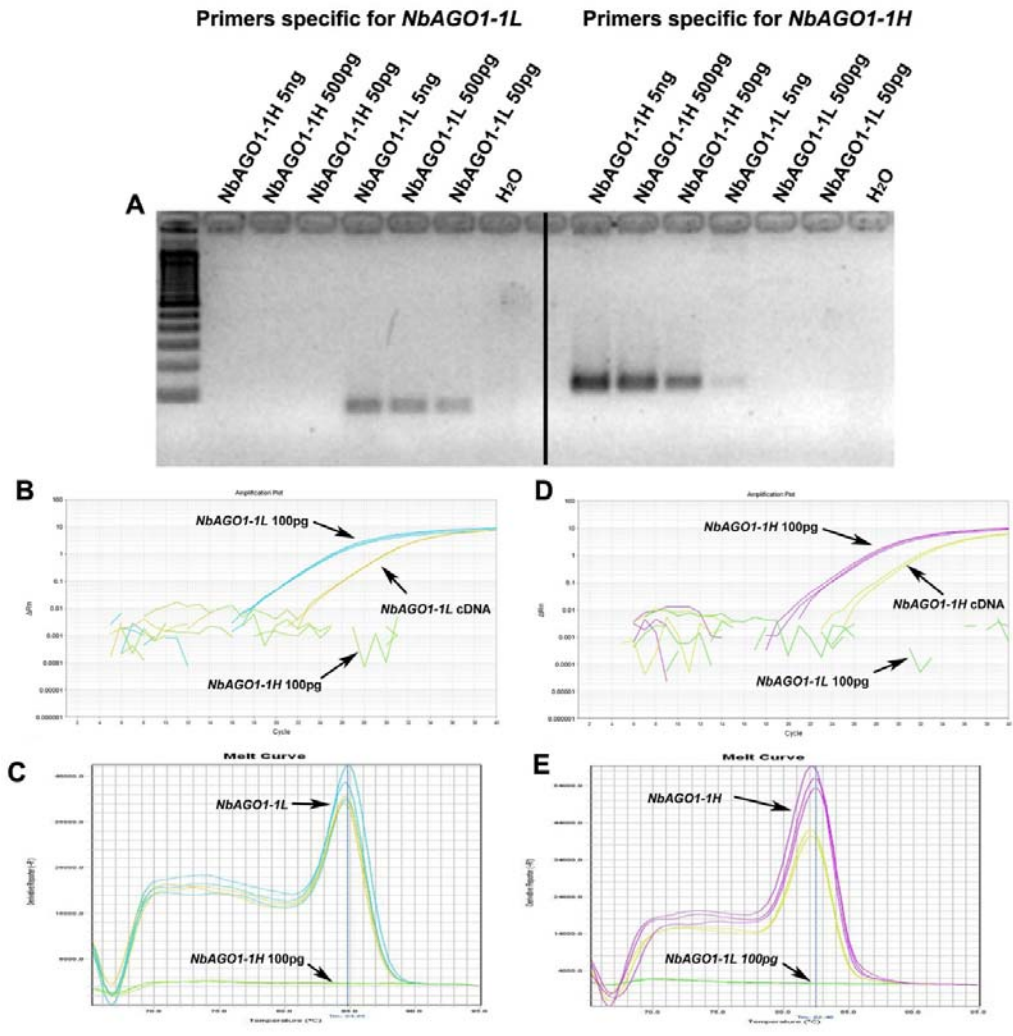

1197

1198  
1199  
1200  
1201  
1202  
1203  
1204  
1205  
1206  
1207  
1208  
1209  
1210  
1211  
1212  
1213  
1214  
1215  
1216  
1217  
1218  
1219  
1220

**Figure S6**

```

NbAGO1-1H      UAUCAACGAGGUGGAGGACAACCCAGCGCCGUGGUGGCAUAGGUGGCCAUGGGGCACCUUCUGGUGGCCUCCUCGSCACCAUUACCCGAGCUGCA1CCCAAGCAAACCAGACUCAAUCAGCCUGUAC-----CAUAUGGAAGACCAUCAGAAACA
StuAGO1-like  -AUCAACGAGGGGAGGACAACCCAGCGCUGUGGUGGUAUAGGGGGCCGUGGG---CUUCUGGUGGCCUUCUAGSCACCAUUACCCGAGCUGCA2CCCAAGCAAACCAGACUCAAUCAGCCUGUAC-----CAUAUGGAAGACCAUCAGAAACA
StuAGO1B-like -AAACAACGAGGUGGAGGACAACCCAGCACAUAUGGUGGCCAUGGUGGCCGUGGAGCACCUUCUGGUGGCCUUCUAGSCACCAUUACCCGAGCUGCA3CCCAAGCAAACCAGACUCAAUCAGCCUGUAC-----CAUAUGGAAGACCAUCAGAAACA
SlyAGO1A-like ---CAACGAGGGGAGGACAACCCAGCGCCGUGGUGGUAUAGGGGGCCGUGGGCACCUUCUGGUGGCCUUCUAGSCACCAUUACCCGAGCUGCA4CCCAAGCAAACCAGACUCAAUCAGCCUGUAC-----CAUAUGGAAGACCAUCAGAAACA
SlyAGO1B     CAACAACGAGGUGGAGGACCACUCCAGCAACAUGGUGGCCAUGGUGGCCGUGGAGCACCUUCUGGUGGCCUUCUAGSCACCAUUACCCGAGCUGCA5CCCAAGCAAACCAGACUCAAUCAGCCUGUAC-----CAUAUGGAAGACCAUCAGAAACA
                *****          ** * **** *      *****    ** * **** *      .....:*** * * *:
                *****          ** * **** *      *****    ** * **** *      .....:*** * * *:
                *****          ** * **** *      *****    ** * **** *      .....:*** * * *:
                *****          ** * **** *      *****    ** * **** *      .....:*** * * *:

                miR168 target site                                     ↑       21nt indel   ↑
```
